# Supplementary material for: Resolving sampling and population-size biases in domestication genomics supports a South Asian origin of walnuts
Source: Research Square preprint supplement (doi:10.21203/rs.3.rs-7127779/v1), 2025-08-04
Supplement: Supplementary file 1 [file 15b099f5fd9982cd69ae56bb.docx]

**Supplementary Information**

**Resolving sampling and population-size biases in domestication genomics supports a South Asian origin of walnuts**

Cai-Jin Chen1, Xiao-Xu Pang1,2, Ya-Mei Ding1, Wei-Ping Zhang1, Yang Yang1, Jie Liu3,4, Anush Nersesyan5, Bo-Wen Zhang1, Susanne S. Renner6*, Da-Yong Zhang1* & Wei-Ning Bai1*

1Ministry of Education Key Laboratory for Biodiversity Science and Ecological Engineering, College of Life Sciences, Beijing Normal University, Beijing 100875, China

2College of Ecology, Lanzhou University, Lanzhou 730000, China

3CAS Key Laboratory for Plant and Biodiversity of East Asia, Kunming Institute of Botany, Chinese Academy of Sciences, Kunming, Yunnan, China

4Germplasm Bank of Wild Species, Kunming Institute of Botany, Chinese Academy of Sciences, Kunming, Yunnan, China

5A. Takhtajyan Institute of Botany, Yerevan, Armenia

6Department of Biology, Washington University, Saint Louis, MO 63130, USA

*Corresponding authors: srenner@wustl.edu; [zhangdy@bnu.edu.cn](mailto:zhangdy@bnu.edu.cn); [baiwn@bnu.edu.cn](mailto:baiwn@bnu.edu.cn)

**This PDF file includes:**

Supplementary Figures 1 to 3


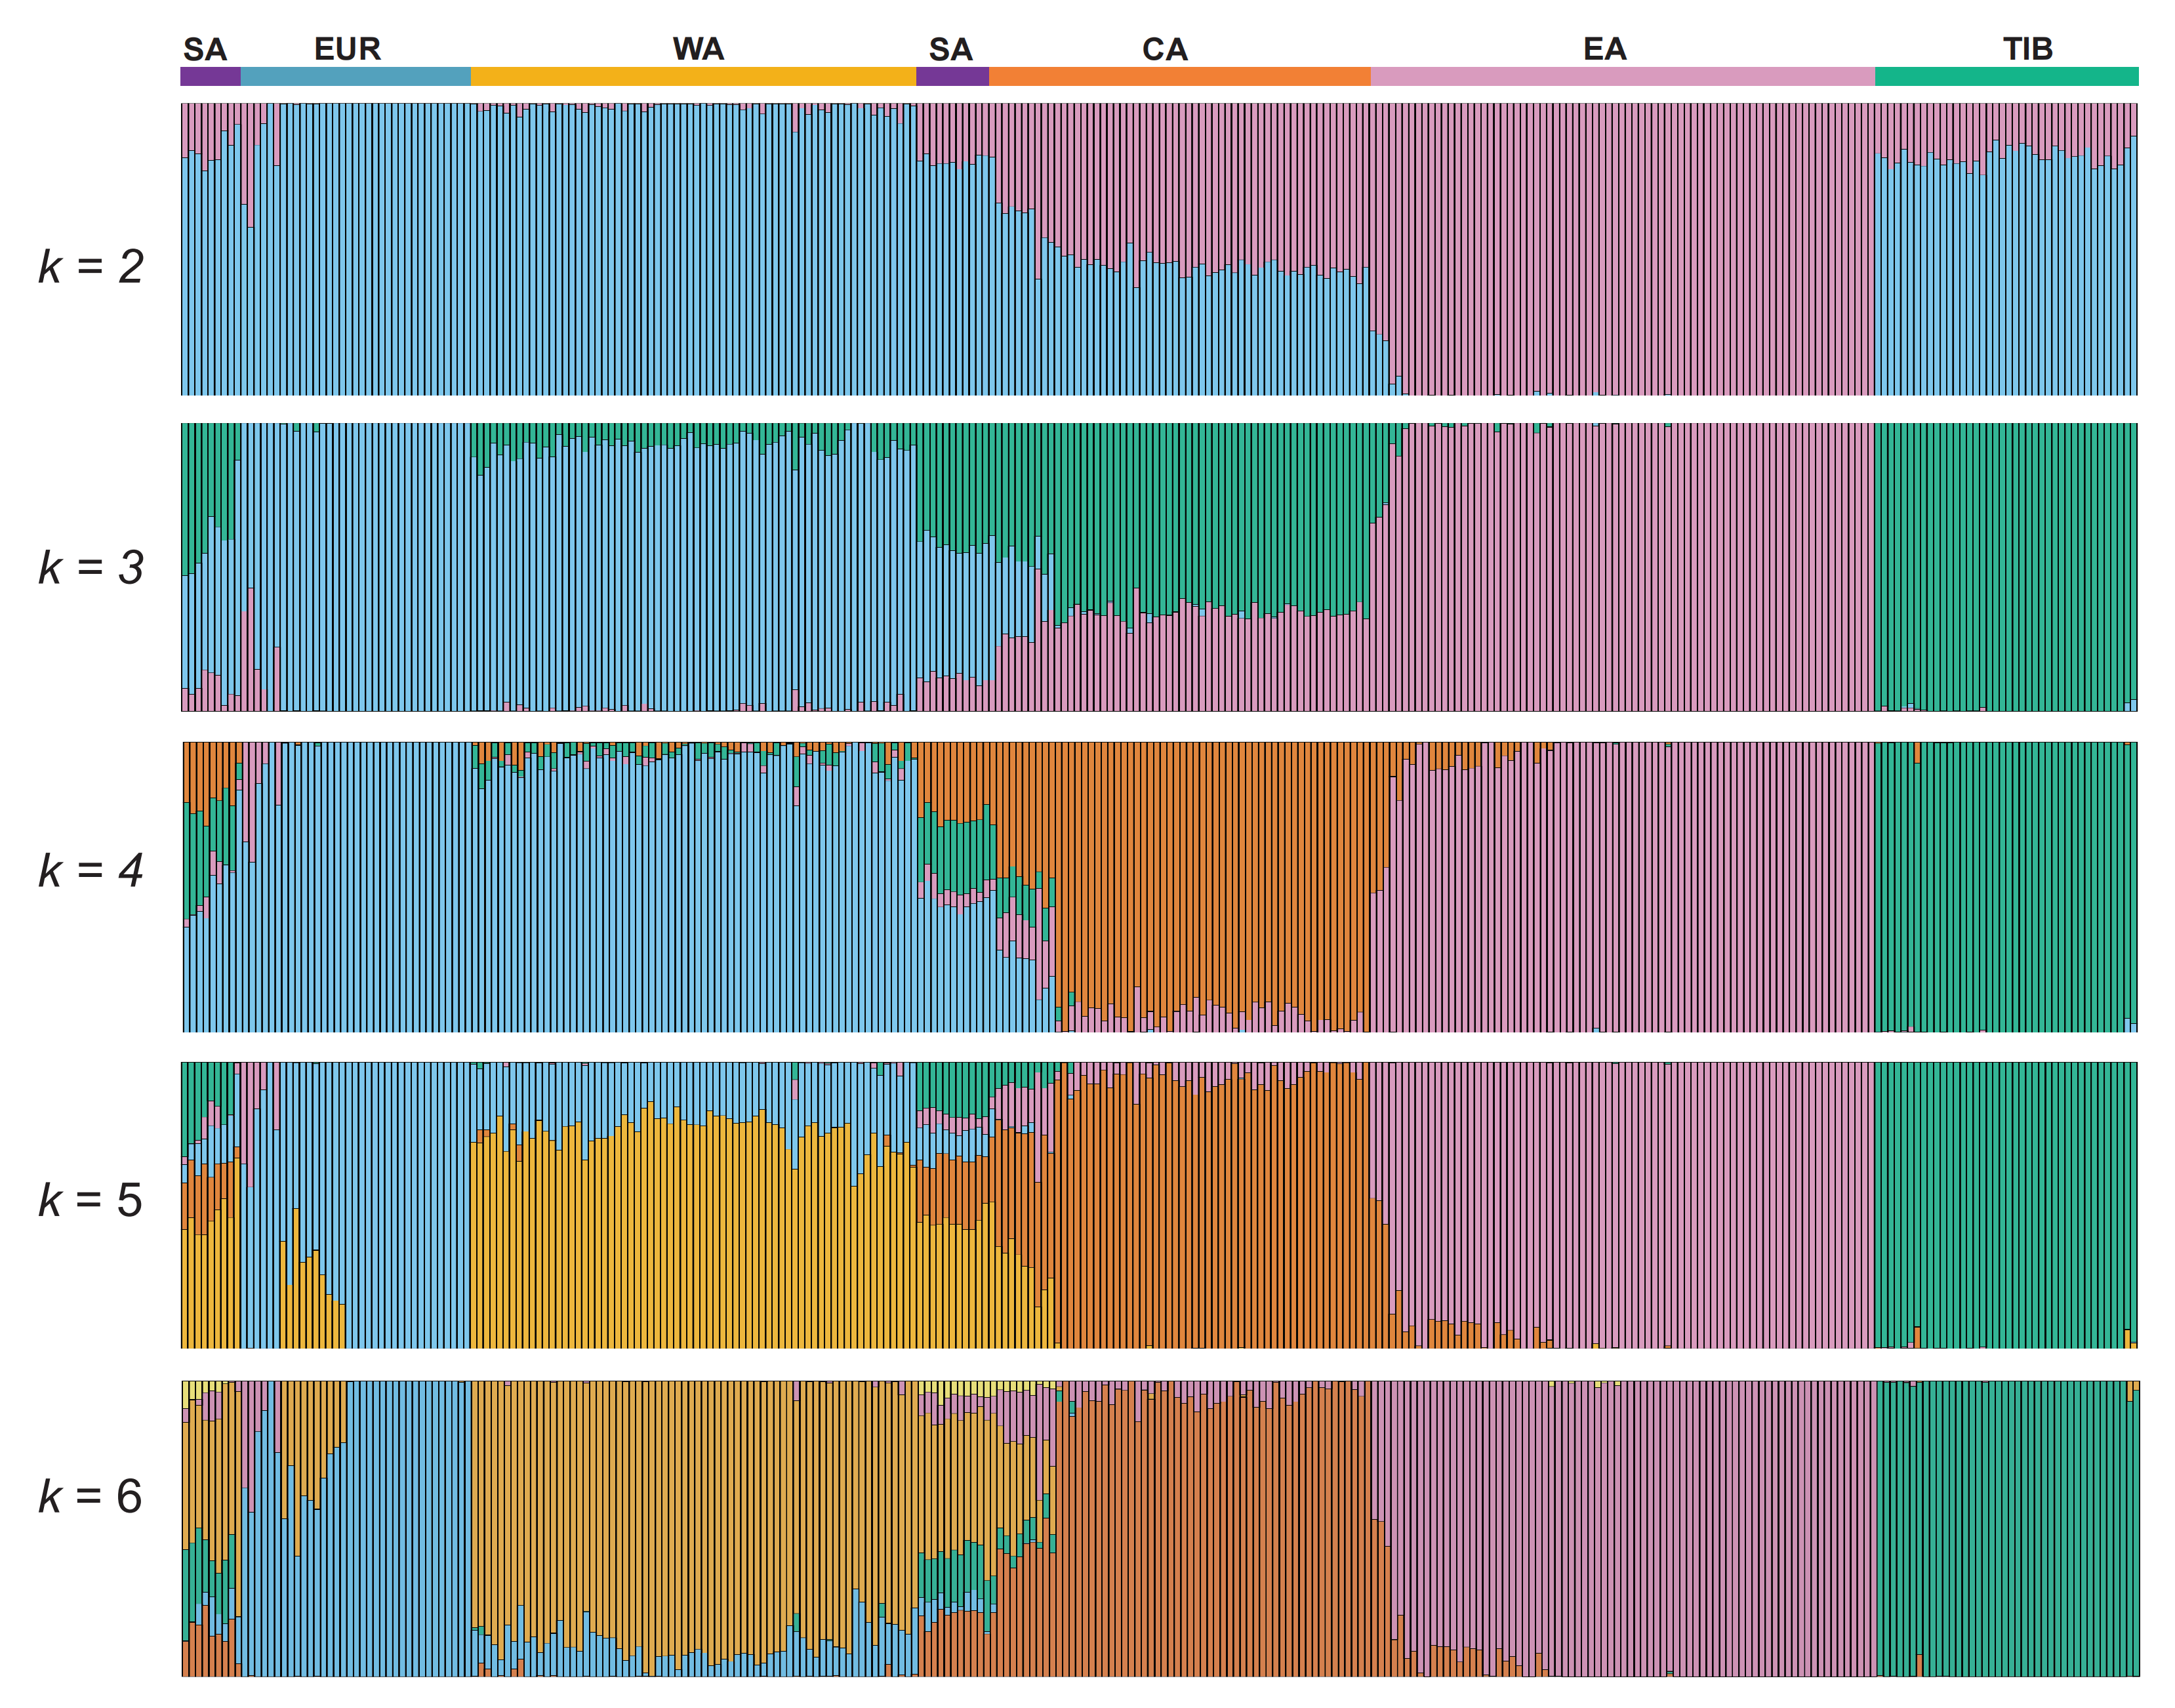


**Supplementary Figure 1.** Population structure analysis 298 individuals of *Juglans regia*. Genetic structure inferred using STRUCTURE v.2.3.4 (Pritchard et al. 2000) with ParamSet2 (the alternative ancestry prior (POPALPHA = 1), a small ALPHA value (ALPHA = 0.25), and uncorrelated allele frequency model (FREQSCORR = 0)). The y-axis represents the *q* value, and the x-axis shows each individual. Color coding: Europe (EUR, blue), West Asia (WA, yellow), Central Asia (CA, orange), East Asia (EA, pink), Tibet (TIB, green), and South Asia (SA, purple).


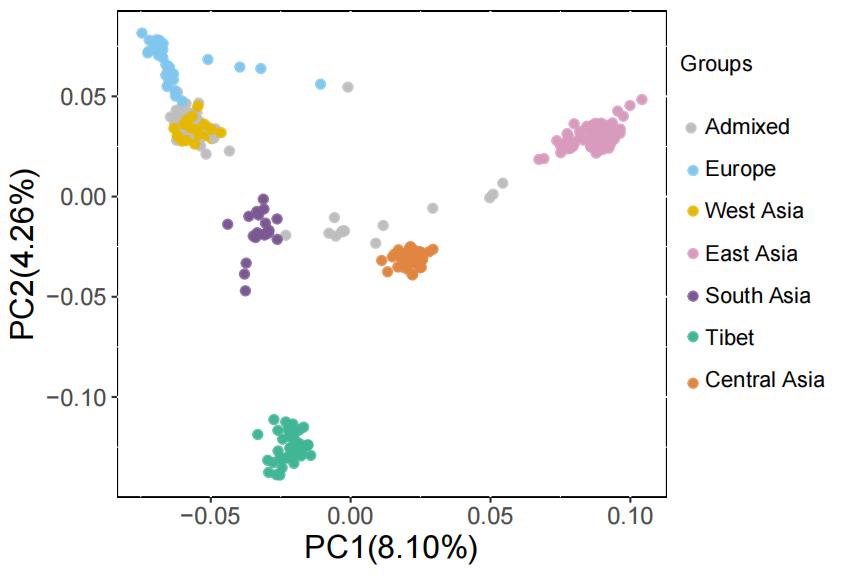


**Supplementary Figure 2.** A principal component analysis (PCA) of 298 individuals of *Juglans regia*.


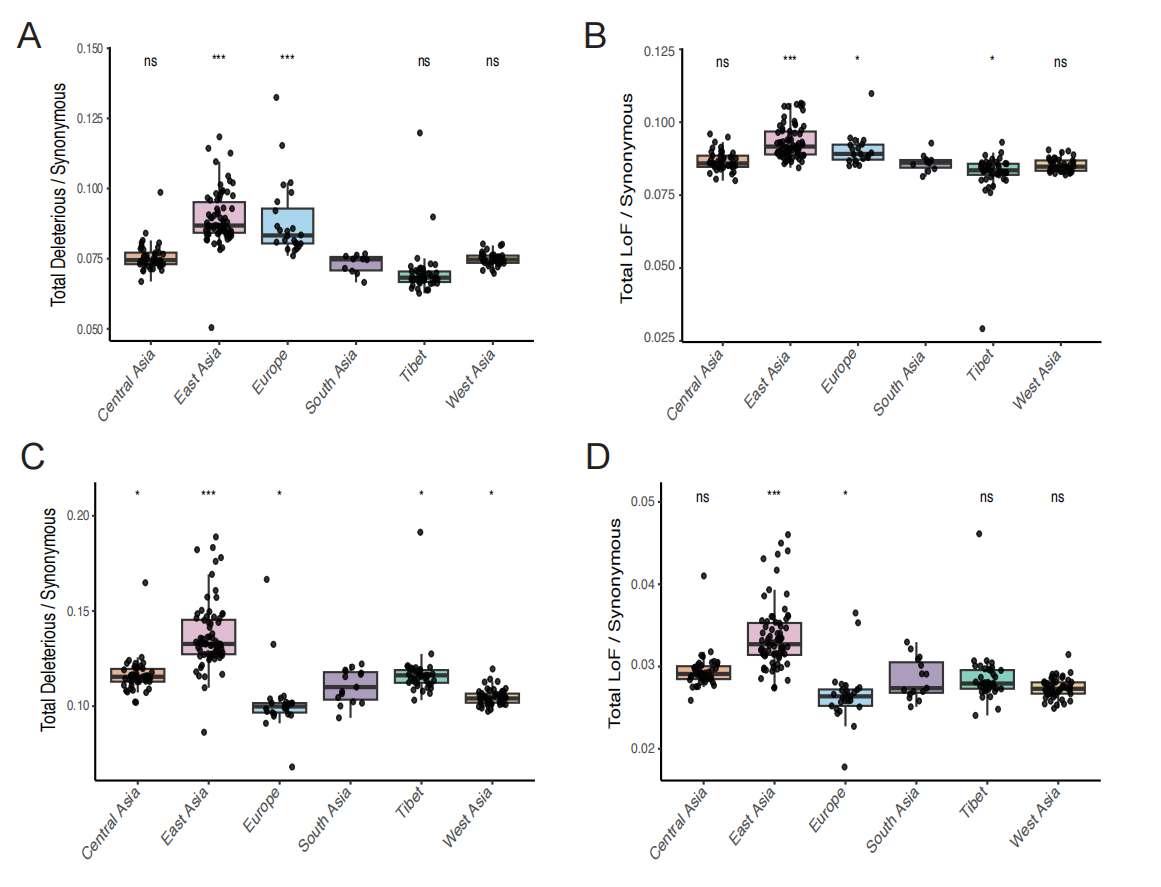


**Supplementary Figure 3.** Mutational load, and loss-of-function (LoF) variants were analyzed in six groups of *Juglans regia* using the Tibetan reference genome (A-B) (Zhang et al. 2020) and Chandler 2.0 reference genome (C-D) (Marrano et al. 2020). The ratios of derived deleterious variants (A, C) and LoF variants (B, D) to synonymous variants were calculated for each individual. *p*-values were derived using t-tests comparing each group to “South Asia”, with significance levels indicated as “***” *p* < 0.001, “**” *p* < 0.01, “*” *p* < 0.05, “ns” *p* > 0.05.
