# Supplementary material for: Resolving sampling and population-size biases in domestication genomics supports a South Asian origin of walnuts
Source: Research Square preprint supplement (doi:10.21203/rs.3.rs-7127779/v1), 2025-08-04
Supplement: Supplementary file 2 [file 73f357ed070b79099ed4ed6f.xlsx]

## Sheet: Table S1
Table S1. Details of the sample locations, exclusion threshold, kinship level and Q values at K=6 in STRUCTURE.
No.	sample_id	SRR ID/CNS ID	Region	Latitude (N)	Longitude(E)	Mapping depth	Exclusion threshold (Jsi >0.1)	Kinship Level (≤3 generations)	STUCTURE
									Component1	Component2	Component3	Component4	Component5	Component6	depth	Group
1	Jre-Afghanistan	CNS0261982	Afghanistan	34.9341	66.8972	20			0.2593	0	0	0.7407	0	0	20	Admixed
2	Jre-Armenia1	new	Lori Marz, Armenia	40.977	44.66	25			0.1538	0.001	0.008	0.8272	0.001	0.009	25	West Asia
3	Jre-Armenia2	new	Siunik Marz, Armenia	39.065	46.383	28			0.1952	0.005	0	0.5546	0.025	0.2202	28	Admixed
4	Jre-B7	SRR18664002	Xizang, China	29.2167	95.2667	23	Jsi>0.1								23
5	Jre-BDC2	SRR18664004	Xizang, China	29.2167	95.2667	18	Jsi>0.1								18
6	Jre-BDC3	new	Xizang, China	29.2167	95.2667	31	Jsi>0.1								31
7	Jre-BDC4	SRR18664003	Xizang, China	29.2167	95.2667	26	Jsi>0.1								26
8	Jre-BLS1	SRR18664053	Ghent, Belgium	51.0249	3.7253	33			0.993	0	0	0.007	0	0	33	Europe
9	Jre-cro12	SRR18663986	Croatia,Jezero,Jarun	45.7821	15.9386	25			1	0	0	0	0	0	25	Europe
10	Jre-cro17	SRR18663980	Croatia,Kloštar-Ivanić	45.736	16.4189	28			0.974	0	0	0.026	0	0	28	Europe
11	Jre-cro28	SRR18663979	Croatia,Hvar	43.1718	16.4424	25			0.999	0	0	0.001	0	0	25	Europe
12	Jre-cro29	SRR18664051	Croatia,Jastrebarsko	45.719	15.6339	33			1	0	0	0	0	0	33	Europe
13	Jre-cro32	SRR18664050	Croatia,Pifari,Istria	45.1464	13.8574	28			0.999	0	0	0.001	0	0	28	Europe
14	Jre-cro33	SRR18664049	Croatia,Pifari,Istria	45.1452	13.8584	30			0.978	0	0	0.022	0	0	30	Europe
15	Jre-cro34	SRR18664048	Croatia,Rovinj,Istria	45.0897	13.6458	27			0.957	0	0	0.043	0	0	27	Europe
16	Jre-cro39	SRR18664047	Croatia,Vrana, Dalmatia	43.9556	15.5453	35			0.954	0.003	0	0.043	0	0	35	Europe
17	Jre-cro40	SRR18664046	Croatia,Gornja Pastuša, Sisačko-Moslavačka županija	45.326	16.344	28			0.977	0	0	0.023	0	0	28	Europe
18	Jre-cro5	SRR18664045	Croatia,Kloštar-Ivanić	45.7438	16.4274	37			0.998	0	0	0.002	0	0	37	Europe
19	Jre-cro7	SRR18664044	Croatia,Šinkovica Šaška, Hrvatsko Zagorje	46.2498	15.9423	32			0.997	0	0	0.003	0	0	32	Europe
20	Jre-cro8	SRR18664043	Croatia,Jarun, Zagreb	45.7861	15.9355	38			0.961	0	0	0.039	0	0	38	Europe
21	Jre-DownloadAfganistan-PI15	SRR7276567	Afghanistan	34.28	69.11	59			0.042	0.0699	0.011	0.0879	0.03	0.7592	59	South Asia
22	Jre-DownloadBulgaria	SRR7276557	Bulgaria	42.45	23.2	49			0.442	0.001	0.005	0.551	0.001	0	49	Admixed
23	Jre-DownloadChina-AH85	SRR7276525	China	40.3589	116.244	44			0	0	0.997	0	0.003	0	44	Central Asia
24	Jre-DownloadChinaAK67	SRR7276524	China	40.3589	116.244	42			0	0	0.948	0	0.052	0	42	Central Asia
25	Jre-DownloadChina-MAREG	SRR7276561	China	40.3589	116.244	49		Yes							49
26	Jre-DownloadChina-PRLY	SRR7276556	China	40.3589	116.244	46		Yes							46
27	Jre-DownloadChina-XJG6	SRR7276562	China	40.3589	116.244	44			0	0	0.967	0	0.033	0	44	Central Asia
28	Jre-DownloadChina-ZL5	SRR7276517	China	40.3589	116.244	43			0	0	1	0	0	0	43	Central Asia
29	Jre-DownloadFrance-LARA	SRR7276566	France	48.5	2.2	52			0.761	0	0.001	0	0.238	0	52	Europe
30	Jre-DownloadFrance-MEYL	SRR7276521	France	48.5	2.2	48		Yes							48
31	Jre-DownloadGS25	SRR14430161	Gansu, China	33.392	105.434	12		Yes							12
32	Jre-DownloadGS35	SRR14430111	Gansu, China	33.325	105.433	15	Jsi>0.1								15
33	Jre-DownloadGS36	SRR14430191	Gansu, China	33.373	105.478	15	Jsi>0.1								15
34	Jre-DownloadGS37	SRR14430104	Gansu, China	33.355	105.073	14			0	0	0.001	0	0.922	0.077	14	East Asia
35	Jre-DownloadGS39	SRR14430109	Gansu, China	33.487	104.543	18			0	0	0	0	0.885	0.115	18	East Asia
36	Jre-DownloadGS40	SRR14430017	Gansu, China	33.563	104.348	14			0	0	0	0	1	0	14	East Asia
37	Jre-DownloadGS41	SRR14430198	Gansu, China	33.563	104.645	14	Jsi>0.1								14
38	Jre-DownloadGS42	SRR14430119	Gansu, China	32.472	104.502	14	Jsi>0.1								14
39	Jre-DownloadGS43	SRR14430068	Gansu, China	33.571	104.243	16			0	0	0.444	0.001	0.524	0.031	16	Admixed
40	Jre-DownloadGS44	SRR14429975	Gansu, China	34.094	105.081	17			0	0	0.9419	0	0.0581	0	17	Central Asia
41	Jre-DownloadGS45	SRR14429979	Gansu, China	34.095	105.083	15			0	0.004	0.993	0	0.003	0	15	Central Asia
42	Jre-DownloadGS46	SRR14430584	Gansu, China	33.583	105.17	16			0	0.001	0.988	0	0.01	0.001	16	Central Asia
43	Jre-DownloadGS48	SRR14430116	Gansu, China	33.074	105.183	14			0	0	0	0	0.912	0.088	14	East Asia
44	Jre-DownloadGS49	SRR14430006	Gansu, China	33.194	104.522	18			0	0.003	0.012	0.001	0.954	0.03	18	East Asia
45	Jre-DownloadGS4	SRR14430112	Gansu, China	33.249	105.273	16			0	0	0	0	0.8779	0.1221	16	East Asia
46	Jre-DownloadGS50	SRR14430110	Gansu, China	33.398	106.173	13			0	0	0	0	0.9449	0.0551	13	East Asia
47	Jre-DownloadGS51	SRR14430102	Gansu, China	33.483	106.153	12			0	0	0	0	0.946	0.054	12	East Asia
48	Jre-DownloadGS52	SRR14430106	Gansu, China	33.46	106.135	15			0	0	0	0	0.869	0.131	15	East Asia
49	Jre-DownloadGS54	SRR14430108	Gansu, China	33.484	106.023	18	Jsi>0.1								18
50	Jre-DownloadGS55	SRR14430103	Gansu, China	33.492	105.492	16			0	0	0	0	0.895	0.105	16	East Asia
51	Jre-DownloadGS57	SRR14430015	Gansu, China	35.5	102.46	16			0	0	0	0	1	0	16	East Asia
52	Jre-DownloadGS58	SRR14430016	Gansu, China	35.5	102.46	16			0	0	0	0	1	0	16	East Asia
53	Jre-DownloadGS5	SRR14430122	Gansu, China	33.164	105.37	14	Jsi>0.1								14
54	Jre-DownloadGS72	SRR14430615	Gansu, China	35.411	107.429	15			0	0	0.003	0	0.967	0.03	15	East Asia
55	Jre-DownloadGS81	SRR14429956	Gansu, China	35.531	108.044	14			0	0	0.02	0	0.98	0	14	East Asia
56	Jre-DownloadGS83	SRR14429993	Gansu, China	35.365	108.004	15			0	0	0.002	0	0.998	0	15	East Asia
57	Jre-DownloadGS8	SRR14430030	Gansu, China	36.103	103.101	13			0	0	0.999	0	0.001	0	13	Central Asia
58	Jre-DownloadGS9	SRR14429986	Gansu, China	36.103	103.101	14			0	0	0.969	0	0.031	0	14	Central Asia
59	Jre-DownloadIRAN01	SRR14430285	Iran	57.0542	33.641	14			0.295	0.007	0.021	0.675	0.001	0.001	14	Admixed
60	Jre-DownloadIRAN02	SRR14430144	Iran	59.0247	34.9341	13		Yes							13
61	Jre-DownloadIRAN03	SRR14430146	Iran	35.75	51.05	16			0.1209	0.003	0.001	0.8721	0.002	0.001	16	West Asia
62	Jre-DownloadIRAN04	SRR14430256	Iran	35.75	51.05	19			0.1271	0.001	0	0.8719	0	0	19	West Asia
63	Jre-DownloadIRAN05	SRR14430627	Iran	35.75	51.05	16			0.209	0.004	0.001	0.761	0.001	0.024	16	West Asia
64	Jre-DownloadIRAN08	SRR14430295	Iran	35.75	51.05	15		Yes							15
65	Jre-DownloadIRAN09	SRR14430279	Iran	35.75	51.05	16			0.1692	0	0	0.8278	0	0.003	16	West Asia
66	Jre-DownloadIRAN10	SRR14430281	Iran	35.75	51.05	13			0.2472	0	0	0.7528	0	0	13	West Asia
67	Jre-DownloadIRAN13	SRR14430276	Iran	35.75	51.05	20			0.171	0	0	0.829	0	0	20	West Asia
68	Jre-DownloadIRAN15	SRR14430248	Iran	35.75	51.05	13			0.1451	0	0	0.8549	0	0	13	West Asia
69	Jre-DownloadIRAN16	SRR14430267	Iran	35.75	51.05	17			0.1642	0	0	0.8358	0	0	17	West Asia
70	Jre-DownloadIRAN17	SRR14430264	Iran	35.75	51.05	15			0.17	0	0	0.829	0.001	0	15	West Asia
71	Jre-DownloadIRAN19	SRR14430250	Iran	35.75	51.05	18			0.162	0	0	0.837	0.001	0	18	West Asia
72	Jre-DownloadIRAN20	SRR14430143	Iran	35.75	51.05	18			0.1762	0	0	0.8238	0	0	18	West Asia
73	Jre-DownloadIRAN21	SRR14430257	Iran	35.75	51.05	17			0.1822	0	0	0.8138	0.002	0.002	17	West Asia
74	Jre-DownloadIRAN22	SRR14430262	Iran	35.75	51.05	17			0.1742	0	0	0.8258	0	0	17	West Asia
75	Jre-DownloadIRAN23	SRR14430265	Iran	35.75	51.05	15			0.0951	0	0	0.9049	0	0	15	West Asia
76	Jre-DownloadIRAN24	SRR14430268	Iran	35.75	51.05	13			0.15	0	0	0.85	0	0	13	West Asia
77	Jre-DownloadIRAN25	SRR14430274	Iran	35.75	51.05	14			0.187	0.003	0	0.768	0.002	0.04	14	West Asia
78	Jre-DownloadIRAN26	SRR14430275	Iran	35.75	51.05	17			0.2042	0	0.003	0.7848	0.003	0.005	17	West Asia
79	Jre-DownloadIRAN27	SRR14430266	Iran	35.75	51.05	18			0.146	0	0.001	0.852	0	0.001	18	West Asia
80	Jre-DownloadIRAN28	SRR14430270	Iran	35.75	51.05	14			0.13	0.007	0.003	0.857	0	0.003	14	West Asia
81	Jre-DownloadIRAN29	SRR14430324	Iran	35.75	51.05	19			0.2022	0	0.002	0.6276	0.012	0.1562	19	Admixed
82	Jre-DownloadIRAN30	SRR14430515	Iran	35.75	51.05	17		Yes							17
83	Jre-DownloadIRAN31	SRR14430755	Iran	35.75	51.05	17			0.169	0	0	0.813	0	0.018	17	West Asia
84	Jre-DownloadIRAN32	SRR14430280	Iran	35.75	51.05	14		Yes							14
85	Jre-DownloadIRAN33	SRR14430283	Iran	35.75	51.05	15			0.1592	0	0.001	0.8398	0	0	15	West Asia
86	Jre-DownloadIRAN35	SRR14430255	Iran	35.75	51.05	18			0.1562	0	0	0.8438	0	0	18	West Asia
87	Jre-DownloadIRAN36	SRR14430296	Iran	35.75	51.05	18			0.1682	0.009	0.005	0.7117	0	0.1061	18	Admixed
88	Jre-DownloadIRAN37	SRR14430277	Iran	35.75	51.05	10			0.1592	0	0	0.8408	0	0	10	West Asia
89	Jre-DownloadIRAN38	SRR14430252	Iran	35.75	51.05	15			0.1391	0	0	0.8589	0.002	0	15	West Asia
90	Jre-DownloadIRAN39	SRR14430306	Iran	35.75	51.05	14			0.189	0.001	0	0.81	0	0	14	West Asia
91	Jre-DownloadIRAN40	SRR14430520	Iran	35.75	51.05	17			0.892	0	0.001	0	0.107	0	17	Europe
92	Jre-DownloadIRAN41	SRR14430258	Iran	35.75	51.05	14		Yes							14
93	Jre-DownloadIRAN42	SRR14430259	Iran	35.75	51.05	14			0.1592	0	0	0.8408	0	0	14	West Asia
94	Jre-DownloadIRAN43	SRR14430254	Iran	35.75	51.05	14			0.139	0	0	0.861	0	0	14	West Asia
95	Jre-DownloadIRAN44	SRR14430253	Iran	35.75	51.05	14			0.1822	0	0	0.8178	0	0	14	West Asia
96	Jre-DownloadIRAN45	SRR14430308	Iran	35.75	51.05	11			0.173	0	0	0.827	0	0	11	West Asia
97	Jre-DownloadIRAN46	SRR14430309	Iran	35.75	51.05	14			0.2152	0	0	0.7848	0	0	14	West Asia
98	Jre-DownloadIRAN47	SRR14430251	Iran	35.75	51.05	15			0.113	0	0	0.887	0	0	15	West Asia
99	Jre-DownloadIRAN48	SRR14430754	Iran	35.75	51.05	12			0.212	0	0.001	0.638	0.024	0.125	12	Admixed
100	Jre-DownloadIRAN49	SRR14430311	Iran	35.75	51.05	18			0.189	0.001	0	0.808	0.002	0	18	West Asia
101	Jre-DownloadIRAN50	SRR14430521	Iran	35.75	51.05	14		Yes							14
102	Jre-DownloadIRAN52	SRR14430517	Iran	35.75	51.05	12		Yes							12
103	Jre-DownloadIRAN53	SRR14430518	Iran	35.75	51.05	15		Yes							15
104	Jre-DownloadIRAN54	SRR14430263	Iran	35.75	51.05	14			0.1672	0	0.001	0.8318	0	0	14	West Asia
105	Jre-DownloadIRAN55	SRR14430286	Iran	35.75	51.05	15			0.1748	0.001	0	0.7433	0.003	0.0779	15	Admixed
106	Jre-DownloadIRAN56	SRR14430284	Iran	35.75	51.05	13			0.2322	0.002	0	0.7658	0	0	13	West Asia
107	Jre-DownloadIRAN57	SRR14430282	Iran	35.75	51.05	15			0.167	0	0.001	0.808	0.002	0.022	15	West Asia
108	Jre-DownloadIRAN59	SRR14430278	Iran	35.75	51.05	15			0.204	0	0	0.742	0	0.054	15	Admixed
109	Jre-DownloadIRAN60	SRR14430752	Iran	35.75	51.05	17			0.1902	0	0	0.6316	0	0.1782	17	Admixed
110	Jre-DownloadIRAN63	SRR14430297	Iran	35.75	51.05	15		Yes							15
111	Jre-DownloadIRAN64	SRR14430298	Iran	35.75	51.05	16			0.2202	0.004	0	0.7237	0	0.0521	16	Admixed
112	Jre-DownloadIRAN65	SRR14430753	Iran	35.75	51.05	15			0.173	0.001	0	0.756	0	0.07	15	West Asia
113	Jre-DownloadIRAN66	SRR14430302	Iran	35.75	51.05	15			0.2747	0.016	0.002	0.7033	0.003	0.001	15	Admixed
114	Jre-DownloadIRAN67	SRR14430305	Iran	35.75	51.05	13			0.21	0.006	0.002	0.762	0.003	0.017	13	West Asia
115	Jre-DownloadIRAN68	SRR14430307	Iran	35.75	51.05	16			0.1782	0	0	0.8218	0	0	16	West Asia
116	Jre-DownloadIRAN70	SRR14430312	Iran	35.75	51.05	16			0.236	0	0.051	0.672	0	0.041	16	Admixed
117	Jre-DownloadIRAN71	SRR14430294	Iran	35.75	51.05	18			0.185	0.001	0.004	0.753	0	0.057	18	West Asia
118	Jre-DownloadIRAN72	SRR14430314	Iran	35.75	51.05	15		Yes							15
119	Jre-DownloadIRAN79	SRR14430313	Iran	35.75	51.05	15			0.166	0	0.026	0.807	0	0.001	15	West Asia
120	Jre-DownloadIRAN80	SRR14430290	Iran	35.75	51.05	14		Yes							14
121	Jre-DownloadIRAN81	SRR14430293	Iran	35.75	51.05	11			0.172	0	0	0.828	0	0	11	West Asia
122	Jre-DownloadIRAN83	SRR14430292	Iran	35.75	51.05	16			0.3684	0	0	0.6316	0	0	16	Admixed
123	Jre-DownloadIRAN84	SRR14430291	Iran	35.75	51.05	17			0.272	0	0	0.728	0	0	17	Admixed
124	Jre-DownloadIRAN85	SRR14430271	Iran	35.75	51.05	14			0.1139	0.001	0.001	0.8831	0.001	0	14	West Asia
125	Jre-DownloadIRAN86	SRR14430273	Iran	35.75	51.05	16			0.1882	0	0.002	0.8018	0	0.008	16	West Asia
126	Jre-DownloadIRAN90	SRR14430287	Iran	35.75	51.05	15			0.2613	0.037	0	0.6276	0	0.0741	15	Admixed
127	Jre-DownloadIRAN93	SRR14430303	Iran	35.75	51.05	17			0.215	0	0	0.785	0	0	17	West Asia
128	Jre-DownloadIRAN94	SRR14430300	Iran	35.75	51.05	15			0.1962	0	0	0.8038	0	0	15	West Asia
129	Jre-DownloadIRAN95	SRR14430304	Iran	35.75	51.05	14		Yes							14
130	Jre-DownloadIRAN96	SRR14430301	Iran	35.75	51.05	15			0.2092	0	0	0.7908	0	0	15	West Asia
131	Jre-DownloadJapan-SIN5	SRR7276520	Japan	35.42	139.46	42			0.6486	0	0	0.003	0.3483	0	42	Admixed
132	Jre-Pakistan11	CNS0261980	Pakistan	32.04	70.2009	16			0.044	0.03	0.002	0.106	0.001	0.817	16	South Asia
133	Jre-Pakistan3	CNS0261972	Pakistan	33.4563	70.2932	16			0.017	0.003	0	0.088	0.001	0.891	16	South Asia
134	Jre-Pakistan4	CNS0261973	Pakistan	29.5523	71.0286	16			0.125	0.12	0.094	0.328	0	0.333	16	Admixed
135	Jre-Pakistan5	CNS0261974	Pakistan	31.6459	71.398	15			0.016	0.0581	0.01	0.1201	0.011	0.7848	15	South Asia
136	Jre-Pakistan7	CNS0261976	Pakistan	32.5901	72.137	18			0.042	0	0	0.1411	0	0.8168	18	South Asia
137	Jre-Pakistan8	CNS0261977	Pakistan	30.7428	72.2191	14			0.085	0.149	0.002	0.402	0	0.362	14	Admixed
138	Jre-DownloadpBR-2201	SRR14430336	Pakistan	29.6077	68.3228	15			0.066	0.007	0.001	0.155	0.043	0.728	15	Admixed
139	Jre-DownloadpDS-2301	SRR14430333	Pakistan	31.0856	69.308	15			0.068	0.007	0	0.235	0.03	0.66	15	Admixed
140	Jre-DownloadpDS-2302	SRR14430334	Pakistan	33.4563	70.2932	18			0.12	0.001	0	0.154	0.005	0.72	18	Admixed
141	Jre-DownloadpKL-2701	SRR14430328	Pakistan	35.4575	71.8942	20			0.067	0.008	0.001	0.126	0.005	0.793	20	South Asia
142	Jre-DownloadpKL-2704	SRR14430325	Pakistan	34.0105	72.2945	18		Yes							18
143	Jre-DownloadpSZ-2805	SRR14430329	Pakistan	32.5901	72.137	18			0.035	0.049	0	0.1171	0	0.7988	18	South Asia
144	Jre-DownloadpUD-2507	SRR14430327	Pakistan	35.75	51.05	14		Yes							14
145	Jre-DownloadpUD-2508	SRR14430326	Pakistan	35.75	51.05	20			0.045	0.006	0.005	0.1179	0.001	0.8252	20	South Asia
146	Jre-DownloadQH11	SRR14430530	Qinghai, China	36.01	101.2	20			0	0	0.965	0.001	0.034	0	20	Central Asia
147	Jre-DownloadQH12	SRR14429978	Qinghai, China	36.01	101.2	16			0	0	0.9169	0	0.0831	0	16	Central Asia
148	Jre-DownloadQH14	SRR14430542	Qinghai, China	36.03	101.56	15			0	0.001	0.961	0	0.038	0	15	Central Asia
149	Jre-DownloadQH17	SRR14430582	Qinghai, China	36.01	102.01	13			0	0.002	0.9429	0	0.0551	0	13	Central Asia
150	Jre-DownloadQH23	SRR14429976	Qinghai, China	35.38	102.05	16			0	0	0.9349	0	0.0641	0.001	16	Central Asia
151	Jre-DownloadQH24	SRR14430543	Qinghai, China	35.52	102.18	15			0	0.016	0.958	0	0.026	0	15	Central Asia
152	Jre-DownloadQH25	SRR14430037	Qinghai, China	35.47	102.24	13			0	0	0.9369	0	0.039	0.024	13	Central Asia
153	Jre-DownloadQH26	SRR14429972	Qinghai, China	35.47	102.24	17			0	0.011	0.892	0.004	0.093	0	17	Central Asia
154	Jre-DownloadQH30	SRR14430092	Qinghai, China	35.5	102.38	14			0	0	0	0	1	0	14	East Asia
155	Jre-DownloadQH32	SRR14430093	Qinghai, China	35.5	102.38	15			0	0	0	0	1	0	15	East Asia
156	Jre-DownloadQH34	SRR14430090	Qinghai, China	35.5	102.38	19			0	0	0	0	1	0	19	East Asia
157	Jre-DownloadQH35	SRR14430091	Qinghai, China	35.5	102.38	14		Yes							14
158	Jre-DownloadQH36	SRR14430094	Qinghai, China	35.5	102.38	20			0	0	0	0	1	0	20	East Asia
159	Jre-DownloadQH37	SRR14430018	Qinghai, China	35.52	102.47	21			0	0	0	0	1	0	21	East Asia
160	Jre-DownloadQH39	SRR14430023	Qinghai, China	35.52	102.51	18			0	0	0	0	1	0	18	East Asia
161	Jre-DownloadQH40	SRR14430013	Qinghai, China	35.52	102.51	16			0	0	0	0	1	0	16	East Asia
162	Jre-DownloadQH41	SRR14430019	Qinghai, China	35.53	102.51	12			0	0	0	0	1	0	12	East Asia
163	Jre-DownloadQH42	SRR14430014	Qinghai, China	35.53	102.51	12			0	0	0	0	1	0	12	East Asia
164	Jre-DownloadQH43	SRR14430100	Qinghai, China	36.07	102.47	11			0	0	0	0	1	0	11	East Asia
165	Jre-DownloadQH44	SRR14430098	Qinghai, China	36.07	102.47	11			0	0	0	0	1	0	11	East Asia
166	Jre-DownloadQH46	SRR14430021	Qinghai, China	36.16	102.43	12			0	0	0	0	1	0	12	East Asia
167	Jre-DownloadQH47	SRR14430022	Qinghai, China	36.16	102.44	13			0	0	0.031	0	0.969	0	13	East Asia
168	Jre-DownloadQH48	SRR14430001	Qinghai, China	36.19	102.46	16			0	0	0	0	1	0	16	East Asia
169	Jre-DownloadQH50	SRR14430004	Qinghai, China	36.2	102.47	18			0.001	0	0	0.001	0.989	0.009	18	East Asia
170	Jre-DownloadQH51	SRR14429999	Qinghai, China	36.2	102.47	18			0	0	0	0	1	0	18	East Asia
171	Jre-DownloadQH52	SRR14430099	Qinghai, China	36.12	102.56	12			0	0	0	0	1	0	12	East Asia
172	Jre-DownloadQH53	SRR14430101	Qinghai, China	36.12	102.56	16		Yes							16
173	Jre-DownloadQH55	SRR14430007	Qinghai, China	36.08	102.51	16		Yes							16
174	Jre-DownloadQH57	SRR14430012	Qinghai, China	36.08	102.51	12			0	0	0	0	1	0	12	East Asia
175	Jre-DownloadQH58	SRR14430011	Qinghai, China	35.5	102.46	16			0	0	0	0	1	0	16	East Asia
176	Jre-DownloadQH59	SRR14430010	Qinghai, China	36.08	102.51	17		Yes							17
177	Jre-DownloadQH60	SRR14430024	Qinghai, China	36.08	102.51	15			0	0	0	0	1	0	15	East Asia
178	Jre-DownloadQH61	SRR14429995	Qinghai, China	36.08	102.41	14			0	0	0	0	1	0	14	East Asia
179	Jre-DownloadQH62	SRR14430008	Qinghai, China	36.2	102.44	14		Yes							14
180	Jre-DownloadQH64	SRR14430095	Qinghai, China	36.27	102.34	13			0	0	0	0	1	0	13	East Asia
181	Jre-DownloadQH65	SRR14430097	Qinghai, China	36.27	102.34	13		Yes							13
182	Jre-DownloadQH66	SRR14430002	Qinghai, China	26.26	102.34	14			0	0	0.007	0	0.993	0	14	East Asia
183	Jre-DownloadQH68	SRR14430003	Qinghai, China	36.27	102.34	17			0	0	0	0	1	0	17	East Asia
184	Jre-DownloadQH70	SRR14429996	Qinghai, China	36.26	102.34	15			0	0	0	0	1	0	15	East Asia
185	Jre-DownloadQH71	SRR14430000	Xizang, China	36.27	102.34	13			0	0	0	0	1	0	13	East Asia
186	Jre-DownloadTibet10	SRR14430424	Xizang, China	29.14	92.587	16			0	1	0	0	0	0	16	Tibet
187	Jre-DownloadTibet11	SRR14430428	Xizang, China	29.14	92.587	16			0	1	0	0	0	0	16	Tibet
188	Jre-DownloadTibet12	SRR14430417	Xizang, China	29.14	92.587	14			0	1	0	0	0	0	14	Tibet
189	Jre-DownloadTibet13	SRR14430431	Xizang, China	29.14	92.587	12			0	1	0	0	0	0	12	Tibet
190	Jre-DownloadTibet14	SRR14430419	Xizang, China	29.14	92.587	10			0	0.999	0	0	0.001	0	10	Tibet
191	Jre-DownloadTibet15	SRR14430435	Xizang, China	29.14	92.587	10			0	0.998	0.001	0	0.001	0	10	Tibet
192	Jre-DownloadTibet17	SRR14430414	Xizang, China	29.14	92.587	14			0	0.998	0	0.002	0	0	14	Tibet
193	Jre-DownloadTibet18	SRR14430341	Xizang, China	29.14	92.587	12			0.002	0.929	0	0.001	0.001	0.067	12	Tibet
194	Jre-DownloadTibet20	SRR14430434	Xizang, China	29.14	92.587	13			0.004	0.994	0.001	0.001	0	0	13	Tibet
195	Jre-DownloadTibet23	SRR14430423	Xizang, China	29.14	92.587	11			0	0.991	0.003	0.001	0.005	0	11	Tibet
196	Jre-DownloadTibet24	SRR14430425	Xizang, China	29.14	92.587	15			0	1	0	0	0	0	15	Tibet
197	Jre-DownloadTibet26	SRR14430422	Xizang, China	29.14	92.587	14			0	1	0	0	0	0	14	Tibet
198	Jre-DownloadTibet27	SRR14430426	Xizang, China	29.14	92.587	11		Yes							11
199	Jre-DownloadTibet28	SRR14430344	Xizang, China	29.14	92.587	13		Yes							13
200	Jre-DownloadTibet29	SRR14430345	Xizang, China	29.14	92.587	14			0	1	0	0	0	0	14	Tibet
201	Jre-DownloadTibet3	SRR14430421	Xizang, China	29.14	92.587	12			0	1	0	0	0	0	12	Tibet
202	Jre-DownloadTibet30	SRR14430427	Xizang, China	29.14	92.587	14			0	0.999	0	0	0.001	0	14	Tibet
203	Jre-DownloadTibet31	SRR14430413	Xizang, China	29.14	92.587	13			0.005	0.972	0.019	0.001	0	0.003	13	Tibet
204	Jre-DownloadTibet37	SRR14430342	Xizang, China	29.574	94.483	15			0	1	0	0	0	0	15	Tibet
205	Jre-DownloadTibet38	SRR14430346	Xizang, China	29.574	94.483	13			0	0.8819	0.04	0.005	0	0.0731	13	Tibet
206	Jre-DownloadTibet39	SRR14430339	Xizang, China	29.574	94.483	11		Yes							11
207	Jre-DownloadTibet40	SRR14430340	Xizang, China	29.574	94.483	12			0.001	0.9399	0	0.0591	0	0	12	Tibet
208	Jre-DownloadTibet41	SRR14430337	Xizang, China	29.574	94.483	12			0	0.9	0.002	0.054	0	0.044	12	Tibet
209	Jre-DownloadTibet42	SRR14430439	Xizang, China	29.049	93.068	13			0	1	0	0	0	0	13	Tibet
210	Jre-DownloadTibet43	SRR14430440	Xizang, China	29.049	93.068	13			0	1	0	0	0	0	13	Tibet
211	Jre-DownloadTibet44	SRR14430438	Xizang, China	29.049	93.068	13			0.001	0.998	0	0.001	0	0	13	Tibet
212	Jre-DownloadTibet47	SRR14430432	Xizang, China	29.049	93.068	13			0	1	0	0	0	0	13	Tibet
213	Jre-DownloadTibet49	SRR14430433	Xizang, China	29.049	93.068	15			0	1	0	0	0	0	15	Tibet
214	Jre-DownloadTibet5	SRR14430415	Xizang, China	29.14	92.587	13			0	1	0	0	0	0	13	Tibet
215	Jre-DownloadTibet52	SRR14430436	Xizang, China	29.049	93.068	16			0	1	0	0	0	0	16	Tibet
216	Jre-DownloadTibet55	SRR14430437	Xizang, China	29.049	93.068	14			0	1	0	0	0	0	14	Tibet
217	Jre-DownloadTibet57	SRR14430411	Xizang, China	29.049	93.068	13			0	0.997	0	0	0.003	0	13	Tibet
218	Jre-DownloadTibet59	SRR14430412	Xizang, China	29.049	93.068	13			0	0.989	0	0.001	0.009	0.001	13	Tibet
219	Jre-DownloadTibet60	SRR14430420	Xizang, China	29.049	93.068	14			0	0.994	0	0	0.006	0	14	Tibet
220	Jre-DownloadTibet7	SRR14430338	Xizang, China	29.14	92.587	12		Yes							12
221	Jre-DownloadTibet81	SRR14430587	Xizang, China	29.14	92.587	17			0.001	0	0.993	0.001	0.005	0	17	Central Asia
222	Jre-DownloadUSA-64057	SRR7276538	America	39.91	-77.02	61			0.8308	0	0	0	0.1692	0	61	Europe
223	Jre-DownloadUSA-hart1	SRR7276551	America	39.91	-77.02	47			1	0	0	0	0	0	47	Europe
224	Jre-DownloadUSA-IDA1	SRR7276514	America	39.91	-77.02	47			0.631	0	0	0.369	0	0	47	Admixed
225	Jre-DownloadUSA-MARCH	SRR7276553	America	39.91	-77.02	36		Yes							36
226	Jre-DownloadUSA-PAYN	SRR7276564	America	39.91	-77.02	47		Yes							47
227	Jre-DownloadUSA-SFRA1	SRR7276565	America	39.91	-77.02	46		Yes							46
228	Jre-DownloadUSA-SHARK	SRR7276519	America	39.91	-77.02	50		Yes							50
229	Jre-DownloadUSA-WAT	SRR7276563	America	39.91	-77.02	46		Yes							46
230	Jre-DownloadXJ10	SRR14429974	Xinjiang, China	37.92	77.43	12			0.004	0	0.9139	0.005	0.0771	0	12	Central Asia
231	Jre-DownloadXJ12	SRR14430580	Xinjiang, China	37.932	77.483	11			0	0.039	0.889	0.035	0.023	0.014	11	Central Asia
232	Jre-DownloadXJ15	SRR14429987	Xinjiang, China	37.12	85.82	15			0	0	0.977	0	0.023	0	15	Central Asia
233	Jre-DownloadXJ19	SRR14430590	Xinjiang, China	37.01	85.78	13			0.001	0	0.928	0.002	0.067	0.002	13	Central Asia
234	Jre-DownloadXJ24	SRR14430525	Xinjiang, China	41.27	80.53	14		Yes							14
235	Jre-DownloadXJ25	SRR14430033	Xinjiang, China	41.27	80.53	15			0	0	0.8909	0	0.0861	0.023	15	Central Asia
236	Jre-DownloadXJ26	SRR14430056	Xinjiang, China	41.27	80.53	14		Yes							14
237	Jre-DownloadXJ29	SRR14429984	Xinjiang, China	41.27	80.53	16			0	0	0.928	0	0.072	0	16	Central Asia
238	Jre-DownloadXJ2	SRR14430599	Xinjiang, China	37.95	77.35	15			0	0.005	0.964	0.001	0.03	0	15	Central Asia
239	Jre-DownloadXJ30	SRR14430578	Xinjiang, China	41.27	80.53	19			0	0	0.97	0.002	0.028	0	19	Central Asia
240	Jre-DownloadXJ31	SRR14429985	Xinjiang, China	41.27	80.53	16			0	0	0.991	0	0.009	0	16	Central Asia
241	Jre-DownloadXJ36	SRR14430607	Xinjiang, China	41.27	80.53	17			0	0	0.932	0	0.068	0	17	Central Asia
242	Jre-DownloadXJ38	SRR14430039	Xinjiang, China	41.27	80.53	13			0	0.001	0.936	0	0.024	0.039	13	Central Asia
243	Jre-DownloadXJ39	SRR14430600	Xinjiang, China	41.27	80.53	15		Yes							15
244	Jre-DownloadXJ40	SRR14429981	Xinjiang, China	41.27	80.53	16			0	0	0.999	0	0.001	0	16	Central Asia
245	Jre-DownloadXJ41	SRR14429982	Xinjiang, China	41.27	80.53	15		Yes							15
246	Jre-DownloadXJ42	SRR14430593	Xinjiang, China	41.27	80.53	13			0	0	0.956	0	0.044	0	13	Central Asia
247	Jre-DownloadXJ46	SRR14430034	Xinjiang, China	41.26	80.53	15			0.004	0	0.9109	0.013	0.04	0.032	15	Central Asia
248	Jre-DownloadXJ47	SRR14430577	Xinjiang, China	41.26	80.53	14			0	0.004	0.9159	0.042	0.038	0	14	Central Asia
249	Jre-DownloadXJ48	SRR14429965	Xinjiang, China	41.27	80.53	13		Yes							13
250	Jre-DownloadXJ4	SRR14429970	Xinjiang, China	37.43	77.38	13			0	0.001	0.9099	0	0.0891	0	13	Central Asia
251	Jre-DownloadXJ5	SRR14429971	Xinjiang, China	37.86	77.28	16			0.001	0.008	0.9249	0	0.0661	0	16	Central Asia
252	Jre-DownloadXJ6	SRR14429973	Xinjiang, China	37.83	77.26	22			0	0	0.993	0	0.007	0	22	Central Asia
253	Jre-DownloadXJ7	SRR14429964	Xinjiang, China	38.02	77.28	20		Yes							20
254	Jre-DownloadXJ8	SRR14430601	Xinjiang, China	37.96	77.33	15			0	0.002	0.9119	0	0.0801	0.006	15	Central Asia
255	Jre-EMS1	SRR18664012	Sichuan, China	29.5909	103.38	36	Jsi>0.1								36
256	Jre-EMS2	SRR18664011	Sichuan , China	29.5909	103.38	35	Jsi>0.1								35
257	Jre-FJY2	SRR18664010	Guizhou, China	26.7409	104.278	29	Jsi>0.1								29
258	Jre-FJY3	SRR18664009	Guizhou, China	26.7409	104.278	27	Jsi>0.1								27
259	Jre-FJY4	SRR18664007	Guizhou, China	26.7409	104.278	36	Jsi>0.1								36
260	Jre-France-Fra	CNS0262250	France	47.5254	1.05894	14			0	0.001	0.923	0.001	0.074	0.001	14	Central Asia
261	Jre-France-Mey	CNS0262082	France	47.5254	1.05894	20		Yes							20
262	Jre-France-Ver	CNS0262070	France	47.5254	1.05894	16			1	0	0	0	0	0	16	Europe
263	Jre-GL10	SRR14888647	Xinjiang, China	43.3167	82.25	26		Yes							26
264	Jre-GL36	SRR14888648	Xinjiang, China	43.3167	82.25	31			0	0	0.096	0	0.196	0.708	31	Admixed
265	Jre-GL43	SRR14888649	Xinjiang, China	43.3167	82.25	26		Yes							26
266	Jre-GL51	SRR5097500	Xinjiang, China	43.3167	82.25	41			0	0	0.211	0	0.115	0.674	41	Admixed
267	Jre-GSPL-SGR01	Liujie	Gansu, China	35.1454	106.681	34			0	0	0	0	0.977	0.023	34	East Asia
268	Jre-GSQY	CNS0262012	Gansu, China	36.0655	103.832	16			0	0	0.973	0	0.027	0	16	Central Asia
269	Jre-GSTS-GQR04	Liujie	Gansu, China	34.4163	105.967	25			0	0	0.007	0	0.986	0.007	25	East Asia
270	Jre-GSWQ	CNS0262103	Gansu, China	33.583	105.17	20			0	0	0.954	0	0.046	0	20	Central Asia
271	Jre-GSWW-WLZR05	Liujie	Gansu, China	37.9333	102.647	55			0	0	0	0	1	0	55	East Asia
272	Jre-GX10	SRR18664001	Xizang, China	29.65	91.1	20	Jsi>0.1								20
273	Jre-GX15	SRR9313659	Xizang, China	29.65	91.1	24	Jsi>0.1								24
274	Jre-GX3	new	Xizang, China	29.65	91.1	25	Jsi>0.1								25
275	Jre-GZLPS	CNS0262192	Guizhou, China	26.393	104.202	13	Jsi>0.1								13
276	Jre-GZZN	CNS0262233	Guizhou, China	26.403	104.183	13	Jsi>0.1								13
277	Jre-HPS17	SRR14888651	Shaanxi, China	33.8167	107.75	23			0	0	0.001	0	0.999	0	23	East Asia
278	Jre-HPS25	SRR14888653	Shaanxi, China	33.8167	107.75	32			0	0	0	0	1	0	32	East Asia
279	Jre-HPS4	SRR14888650	Shaanxi, China	33.8167	107.75	34			0	0	0	0	1	0	34	East Asia
280	Jre-HPS9	SRR5097480	Shaanxi, China	33.8167	107.75	30			0	0	0.036	0	0.964	0	30	East Asia
281	Jre-HSA13	SRR14888654	Henan, China	33.6332	111.809	35			0	0	0.1081	0	0.8909	0.001	35	East Asia
282	Jre-HSA14	SRR14888655	Henan, China	33.6332	111.809	32			0.001	0.021	0.161	0	0.816	0.001	32	East Asia
283	Jre-HT1	new	Xinjiang, China	37.0904	79.8662	26			0	0	0.934	0	0.066	0	26	Central Asia
284	Jre-HT2	new	Xinjiang, China	37.0904	79.8662	25			0.001	0.005	0.9379	0	0.0561	0	25	Central Asia
285	Jre-India	CNS0262004	India	29.5061	76.5423	14			0.001	0.1231	0	0.0741	0	0.8018	14	South Asia
286	Jre-IRAN-7mesh	CNS0262195	Iran	46.0795	46.2167	15			0.188	0.002	0	0.808	0	0.002	15	West Asia
287	Jre-IRAN-Bko	CNS0262200	Iran	38.1053	47.1095	15			0.245	0	0	0.702	0.003	0.05	15	Admixed
288	Jre-IRAN-Charkhe	CNS0262194	Iran	34.9649	47.2019	15			0.149	0	0	0.851	0	0	15	West Asia
289	Jre-IRAN-Divandarreh	CNS0262193	Iran	32.9021	48.1871	16			0.258	0.001	0	0.723	0.002	0.016	16	Admixed
290	Jre-IRAN-Tab	CNS0262196	Iran	34.5339	51.7278	17			0.155	0	0.001	0.843	0.001	0	17	West Asia
291	Jre-IRAN-Tuy	CNS0262192	Iran	36.0425	56.5924	19			0.138	0	0	0.862	0	0	19	West Asia
292	Jre-Iraq-Bko	CNS0262199	Iraq	34.5647	43.5997	18			0.327	0.001	0	0.663	0.009	0	18	Admixed
293	Jre-Italy1	CNS0262011	Italy	43.0224	12.4222	19			0	0	0.999	0	0.001	0	19	Central Asia
294	Jre-Italy25	CNS0262032	Italy	43.0224	12.4222	14		Yes							14
295	Jre-Italy4	CNS0261995	Italy	43.0224	12.4222	15			0	0	0.5506	0	0.4494	0	15	Admixed
296	Jre-Japan-XL	CNS0262228	Japan	36.0669	139.57	11		Yes							11
297	Jre-JFS105	SRR18664016	Chongqing, China	29.0412	107.189	30	Jsi>0.1								30
298	Jre-JFS106	SRR18664015	Chongqing, China	29.0412	107.189	30	Jsi>0.1								30
299	Jre-JFS107	SRR18664014	Chongqing, China	29.0412	107.189	30	Jsi>0.1								30
300	Jre-JFS108	SRR18664013	Chongqing, China	29.0412	107.189	37	Jsi>0.1								37
301	Jre-Korea	CNS0262026	Korea	36.0416	127.886	17			0.001	0	0.048	0	0.951	0	17	East Asia
302	Jre-LC111	SRR18664022	Hubei, China	30.3775	108.579	25	Jsi>0.1								25
303	Jre-LC112	SRR18664021	Hubei, China	30.3775	108.579	34	Jsi>0.1								34
304	Jre-LC113	SRR18664020	Hubei, China	30.3775	108.579	31	Jsi>0.1								31
305	Jre-LC114	SRR18664018	Hubei, China	30.3775	108.579	37	Jsi>0.1								37
306	Jre-LC115	SRR18664017	Hubei, China	30.3775	108.579	27	Jsi>0.1								27
307	Jre-LP133	SRR18664052	Austria	48.2649	16.4017	27			1	0	0	0	0	0	27	Europe
308	Jre-LP149	SRR18664041	Austria	48.2649	16.4017	25			0.7558	0.004	0	0.2392	0.001	0	25	Europe
309	Jre-LP165	SRR18664030	Austria	48.2649	16.4017	27			0.999	0	0	0.001	0	0	27	Europe
310	Jre-LP241	SRR18664019	Austria	47.9284	13.195	28			1	0	0	0	0	0	28	Europe
311	Jre-LP252	SRR18664008	Germany	47.5532	12.9176	29			1	0	0	0	0	0	29	Europe
312	Jre-LP272	SRR18663997	Germany	49.4153	8.7003	28			0.984	0	0	0.016	0	0	28	Europe
313	Jre-LP705	SRR18664038	Russia	55.8444	37.5899	32			0.6767	0.002	0	0.3213	0	0	32	Admixed
314	Jre-LP710	SRR18664037	Russia	55.7784	37.6349	32			0.5696	0.023	0	0.4064	0.001	0	32	Admixed
315	Jre-LS1	SRR14888656	Hebei, China	39.5438	115.499	27			0	0	0.1572	0	0.8428	0	27	East Asia
316	Jre-LS21	SRR18664005	Guangxi, China	24.4711	106.366	34	Jsi>0.1								34
317	Jre-LS2	SRR14888657	Hebei, China	39.5438	115.499	30			0	0	0.101	0	0.899	0	30	East Asia
318	Jre-LS3	SRR14888658	Hebei, China	39.5438	115.499	31			0	0	0.058	0	0.942	0	31	East Asia
319	Jre-Lu-land	CNS0262218	Shandong, China	36.6749	117.027	18		Yes							18
320	Jre-Lu-wild	CNS0262204	Shandong, China	36.6749	117.027	18		Yes							18
321	Jre-Nepal	CNS0262071	Nepal	29.1136	80.8373	16			0.06	0.128	0.008	0.127	0	0.677	16	Admixed
322	Jre-Nkorea-WJ	CNS0262241	North Korea	36.0416	127.886	19			0.6126	0	0.001	0.3864	0	0	19	Admixed
323	Jre-Pakistan-Akr	CNS0261969	Pakistan	32.3027	73.2864	18			0.0919	0.028	0.001	0.1918	0.003	0.6843	18	Admixed
324	Jre-Pakistan-Ban	CNS0261978	Pakistan	31.1122	73.3685	16			0.037	0.06	0.002	0.121	0.001	0.779	16	South Asia
325	Jre-Pakistan-Kab	CNS0261979	Pakistan	34.4107	73.4029	14			0.061	0.048	0.037	0.113	0.002	0.739	14	Admixed
326	Jre-Pakistan-Land	CNS0261960	Pakistan	36.0425	74.2034	20			0.001	0.1351	0.001	0.1952	0	0.6677	20	Admixed
327	Jre-Pakistan-Rab	CNS0261975	Pakistan	28.526	70.2076	17			0.014	0.013	0	0.162	0.001	0.81	17	South Asia
328	Jre-Poland	CNS0261993	Poland	39.444	-86.9494	17			0.708	0	0	0.292	0	0	17	Admixed
329	Jre-QHGD-HXR03	Liujie	Qinghai, China	36.0111	101.399	22			0	0	0	0	1	0	22	East Asia
330	Jre-QHHD-MLZR13	Liujie	Qinghai, China	36.181	102.909	56			0	0	0	0	1	0	56	East Asia
331	Jre-QHHN-KYR06	Liujie	Qinghai, China	36.0657	101.909	46			0	0	0	0	1	0	46	East Asia
332	Jre-Qin-wild2	CNS0262217	Shanxi, China	34.2758	108.96	14	Jsi>0.1								14
333	Jre-R1	SRR6382584	Beijing, China	39.95	116.283	45			0	0	0.1091	0	0.8909	0	45	East Asia
334	Jre-Romania	CNS0262137	Romania	45.9432	24.9668	19			0.5616	0.001	0	0.4364	0.001	0	19	Admixed
335	Jre-SCJT	CNS0262176	Sichuan, China	30.5775	104.073	22			0	0	0.559	0	0.441	0	22	Admixed
336	Jre-SCMX	CNS0262062	Sichuan, China	30.5775	104.073	16			0	0	0.928	0.028	0.044	0	16	Central Asia
337	Jre-ser25	SRR18664042	Serbia,Gnjilica, Raški okrug	43.252	20.6345	29		Yes							29
338	Jre-ser26	new	Serbia,Gnjilica, Raški okrug	43.252	20.6345	32			0.7648	0	0	0.2352	0	0	32	Europe
339	Jre-ser27	SRR18664040	Serbia,Gnjilica, Raški okrug	43.252	20.6345	31			0.7818	0	0	0.2182	0	0	31	Europe
340	Jresh-XZCY1	new	Xizang, China	28.4899	97.0055	21	Jsi>0.1								21
341	Jresh-YNGS2	new	Yunnan, China	28.0307	98.6119	21	Jsi>0.1								21
342	Jresh-YNGS3	new	Yunnan, China	28.094	98.5731	20	Jsi>0.1								20
343	Jresh-YNGS4	new	Yunnan, China	28.1202	98.5685	21	Jsi>0.1								21
344	Jre-SJM1	SRR18664006	Guizhou, China	26.2532	105.118	22	Jsi>0.1								22
345	Jre-SNJ30	SRR14888659	Hubei, China	31.4947	110.372	30	Jsi>0.1								30
346	Jre-Soviet	CNS0262170	Soviet	56.7602	48.4686	21			0	0	0.1884	0.016	0.0661	0.7295	21	Admixed
347	Jre-Spain	CNS0262048	Spain	39.4989	-3.32174	18			0.5455	0	0.0601	0	0.3944	0	18	Admixed
348	Jre-SS21	SRR14888660	Henan, China	34.5062	112.936	30			0	0	0.2573	0	0.7427	0	30	Admixed
349	Jre-SSL2	SRR18664036	Beijing, China	40.3589	116.244	24			0	0	0.157	0	0.843	0	24	East Asia
350	Jre-SSL3	SRR18664035	Beijing, China	40.3589	116.244	35			0	0	0.155	0	0.845	0	35	East Asia
351	Jre-SSL4	new	Beijing, China	40.3589	116.244	29			0	0	0.1041	0	0.8959	0	29	East Asia
352	Jre-SSL5	SRR18664034	Beijing, China	40.3589	116.244	22			0	0	0.169	0	0.831	0	22	East Asia
353	Jre-SSL6	new	Beijing, China	40.3589	116.244	24			0	0	0.17	0	0.83	0	24	East Asia
354	Jre-SSL7	SRR18664033	Beijing, China	40.3589	116.244	21			0	0	0.1632	0	0.8368	0	21	East Asia
355	Jre-SSL8	SRR18664032	Beijing, China	40.3589	116.244	32			0	0	0.155	0	0.845	0	32	East Asia
356	Jre-SSL9	SRR18664031	Beijing, China	40.3589	116.244	29			0	0	0.132	0	0.868	0	29	East Asia
357	Jre-USA	CNS0262202	America	39.7897	-101.369	18		Yes							18
358	Jre-USA-CMAY	SRR7276518	America	39.91	-77.02	49		Yes							49
359	Jre-VZ989	SRR18664039	Kensay, Kazakstan	43.2312	77.0389	23			0	0	0.2503	0	0.3393	0.4104	23	Admixed
360	Jre-XJ-Hongguang	CNS0262025	Xinjiang, China	39.6966	75.2728	19		Yes							19
361	Jre-XZBM1	new	Xizang, China	30.0201	95.2905	19	Jsi>0.1								19
362	Jre-XZBM2	new	Xizang, China	30.0201	95.2905	23	Jsi>0.1								23
363	Jre-XZBM3	new	Xizang, China	30.0202	95.2867	14	Jsi>0.1								14
364	Jre-XZBS1	new	Xizang, China	30.0203	97.1118	26			0.001	0.999	0	0	0	0	26	Tibet
365	Jre-XZCY2	new	Xizang, China	28.5655	98.8889	24	Jsi>0.1								24
366	Jre-XZCY3	new	Xizang, China	28.5597	98.2728	25	Jsi>0.1								25
367	Jre-XZCY4	new	Xizang, China	28.6117	97.3139	19	Jsi>0.1								19
368	Jre-XZCY5	new	Xizang, China	28.7484	97.4691	24	Jsi>0.1								24
369	Jre-XZJC1	new	Xizang, China	29.1517	92.5616	23			0	0.999	0.001	0	0	0	23	Tibet
370	Jre-XZJC2	new	Xizang, China	29.1517	92.5616	25			0	1	0	0	0	0	25	Tibet
371	Jre-XZLandrace1	CNS0262119	Xizang, China	29.654	94.368	20			0	1	0	0	0	0	20	Tibet
372	Jre-XZLandrace2	CNS0262155	Xizang, China	29.654	94.368	17			0	0	0.872	0	0.128	0	17	Central Asia
373	Jre-XZLX1	new	Xizang, China	29.0782	92.8581	25			0	1	0	0	0	0	25	Tibet
374	Jre-XZLX2	new	Xizang, China	29.0693	92.8966	23			0.014	0.0521	0.8559	0	0.0561	0.022	23	Central Asia
375	Jre-XZLX3	new	Xizang, China	29.0693	92.8966	26			0	1	0	0	0	0	26	Tibet
376	Jre-XZLX4	new	Xizang, China	29.0693	92.8966	25		Yes							25
377	Jre-XZLZ1	new	Xizang, China	28.17	91.27	23			0.001	0.982	0	0.003	0.014	0	23	Tibet
378	Jre-XZLZ3	new	Xizang, China	29.0693	92.8966	22			0	0	0.974	0	0.026	0	22	Central Asia
379	Jre-XZLZ4	new	Xizang, China	28.18	91.38	23		Yes							23
380	Jre-XZLZ5	new	Xizang, China	28.27	91.11	23			0	0	0.999	0	0.001	0	23	Central Asia
381	Jre-XZML1	new	Xizang, China	29.115	93.7841	23			0	1	0	0	0	0	23	Tibet
382	Jre-XZML2	new	Xizang, China	29.1407	93.665	24			0	1	0	0	0	0	24	Tibet
383	Jre-Y14	SRR9313656	Yunnan, China	25.2833	100.267	34	Jsi>0.1								34
384	Jre-Y23	SRR18664000	Yunnan, China	25.6166	99.8658	34	Jsi>0.1								34
385	Jre-Y31	SRR18663999	Yunnan, China	25.6166	99.8658	29	Jsi>0.1								29
386	Jre-YC1	SRR18664029	Beijing, China	40.0411	115.75	25			0	0	0.156	0	0.844	0	25	East Asia
387	Jre-YC2	SRR18664028	Beijing, China	40.0411	115.75	25			0	0.001	0.1351	0	0.8639	0	25	East Asia
388	Jre-YC3	SRR18664027	Beijing, China	40.0411	115.75	30			0	0	0.028	0	0.972	0	30	East Asia
389	Jre-YC4	SRR18664026	Beijing, China	40.0411	115.75	32			0	0	0.078	0	0.922	0	32	East Asia
390	Jre-YC5	SRR18664025	Beijing, China	40.0411	115.75	25			0	0	0.037	0	0.963	0	25	East Asia
391	Jre-YC6	SRR18664024	Beijing, China	40.0411	115.75	32			0	0	0.0961	0	0.9039	0	32	East Asia
392	Jre-YC7	SRR18664023	Beijing, China	40.0411	115.75	24			0	0	0.158	0	0.842	0	24	East Asia
393	Jre-YN-Dayao	CNS0262232	Yunnan, China	25.68	101.24	18		Yes							18
394	Jre-YN-lijiang	CNS0262225	Yunnan, China	26.8607	100.232	14	Jsi>0.1								14
395	Jre-Tajikistan-Dushanbe1	SRR29145921	Dushanbe, Tajikistan	38.5	68.8	51			0	0	0.1071	0	0.0591	0.8338	51	South Asia
396	Jre-Tajikistan-Dushanbe2	SRR29145920	Dushanbe, Tajikistan	38.5	68.8	41			0	0	0.0831	0	0.1031	0.8138	41	South Asia
397	Jre-Tajikistan-Dushanbe3	SRR29145917	Dushanbe, Tajikistan	38.5	68.8	40			0	0	0.135	0	0.084	0.781	40	South Asia
398	Jre-Tajikistan-Dushanbe4	SRR29145926	Dushanbe, Tajikistan	38.5	68.8	49			0	0	0.0521	0	0.0921	0.8559	49	South Asia
399	Jre-Tajikistan-Dushanbe5	SRR29145929	Dushanbe, Tajikistan	38.5	68.8	42			0	0	0.119	0	0.105	0.776	42	South Asia
400	Jre-AF-BKR05		Kishm, Badakhshan, Afghanistan	36.6189	70.2494
401	Jre-IN-BR05		Ganderbal, Jammu and Kashmir, India	34.1402	74.9297
402	Jre-PK-HSR10		Swat, Khyber Pakhtunkhwa, Pakistan	34.4147	72.4735
403	Jre-IN-IDMR01		Kullu, Himachal, India	31.9566	77.1456
404	Jre-IN-IDMR03		Kurram, Khyber Pakhtunkhwa, Pakistan	32.9566	78.1456
405	Jre-PK-KMR05		Jumla, Karnali, Nepal	33.6959	70.3368
406	Jre-NP-NJP01			29.2736	82.1936

## Sheet: Table S2
Table S2. Three methods used to determine the optimal number of clusters in the Juglans STRUCTURE analyses.
K	Mean_Ln(D|K)	DeltaK	Parsimony
1	-2.66487e+06	-	0.5
2	-2.43434e+06	14379	0.7551
3	-2.33329e+06	1707.89	0.8407
4	-2.27202e+06	2.0381	0.8876
5	-2.23029e+06	3.6894	0.9145
6	-2.20947e+06	121.048	0.9354
7	-2.20238e+06	0.6417	0.8084
8	-2.19628e+06	-	0.7304

## Sheet: Table S3
Table S3. Details of the sample chloroplast haplotypes.
No.	sample_id	Haplotype of chrloroplast
1	Jre-Afghanistan	hap10
2	Jre-Armenia1	hap10
3	Jre-Armenia2	hap10
4	Jre-BLS1	hap10
5	Jre-cro12	hap10
6	Jre-cro17	hap10
7	Jre-cro28	hap10
8	Jre-cro29	hap10
9	Jre-cro32	hap10
10	Jre-cro33	hap10
11	Jre-cro34	hap10
12	Jre-cro39	hap10
13	Jre-cro40	hap10
14	Jre-cro5	hap10
15	Jre-cro7	hap10
16	Jre-cro8	hap10
17	Jre-DownloadAfganistan-PI15	hap17
18	Jre-DownloadBulgaria	hap10
19	Jre-DownloadChina-AH85	hap17
20	Jre-DownloadChinaAK67	hap10
21	Jre-DownloadChina-MAREG	hap10
22	Jre-DownloadChina-PRLY	hap17
23	Jre-DownloadChina-XJG6	hap10
24	Jre-DownloadChina-ZL5	hap10
25	Jre-DownloadFrance-LARA	hap10
26	Jre-DownloadFrance-MEYL	hap10
27	Jre-DownloadGS25	hap18
28	Jre-DownloadGS37	hap19
29	Jre-DownloadGS39	hap17
30	Jre-DownloadGS40	hap17
31	Jre-DownloadGS43	hap10
32	Jre-DownloadGS44	hap17
33	Jre-DownloadGS45	hap17
34	Jre-DownloadGS46	hap10
35	Jre-DownloadGS48	hap17
36	Jre-DownloadGS49	hap17
37	Jre-DownloadGS4	hap17
38	Jre-DownloadGS50	hap17
39	Jre-DownloadGS51	hap17
40	Jre-DownloadGS52	hap17
41	Jre-DownloadGS55	hap17
42	Jre-DownloadGS57	hap17
43	Jre-DownloadGS58	hap17
44	Jre-DownloadGS5	hap17
45	Jre-DownloadGS72	hap17
46	Jre-DownloadGS81	hap17
47	Jre-DownloadGS83	hap17
48	Jre-DownloadGS8	hap10
49	Jre-DownloadGS9	hap17
50	Jre-DownloadIRAN01	hap17
51	Jre-DownloadIRAN02	hap10
52	Jre-DownloadIRAN03	hap10
53	Jre-DownloadIRAN04	hap10
54	Jre-DownloadIRAN05	hap10
55	Jre-DownloadIRAN08	hap10
56	Jre-DownloadIRAN09	hap17
57	Jre-DownloadIRAN10	hap17
58	Jre-DownloadIRAN13	hap17
59	Jre-DownloadIRAN15	hap10
60	Jre-DownloadIRAN16	hap10
61	Jre-DownloadIRAN17	hap10
62	Jre-DownloadIRAN19	hap10
63	Jre-DownloadIRAN20	hap10
64	Jre-DownloadIRAN21	hap10
65	Jre-DownloadIRAN22	hap10
66	Jre-DownloadIRAN23	hap10
67	Jre-DownloadIRAN24	hap10
68	Jre-DownloadIRAN25	hap10
69	Jre-DownloadIRAN26	hap17
70	Jre-DownloadIRAN27	hap10
71	Jre-DownloadIRAN28	hap10
72	Jre-DownloadIRAN29	hap10
73	Jre-DownloadIRAN30	hap10
74	Jre-DownloadIRAN31	hap10
75	Jre-DownloadIRAN32	hap17
76	Jre-DownloadIRAN33	hap17
77	Jre-DownloadIRAN35	hap10
78	Jre-DownloadIRAN36	hap10
79	Jre-DownloadIRAN37	hap17
80	Jre-DownloadIRAN38	hap10
81	Jre-DownloadIRAN39	hap10
82	Jre-DownloadIRAN40	hap10
83	Jre-DownloadIRAN41	hap10
84	Jre-DownloadIRAN42	hap10
85	Jre-DownloadIRAN43	hap10
86	Jre-DownloadIRAN44	hap10
87	Jre-DownloadIRAN45	hap10
88	Jre-DownloadIRAN46	hap10
89	Jre-DownloadIRAN47	hap10
90	Jre-DownloadIRAN48	hap10
91	Jre-DownloadIRAN49	hap10
92	Jre-DownloadIRAN50	hap10
93	Jre-DownloadIRAN52	hap10
94	Jre-DownloadIRAN53	hap10
95	Jre-DownloadIRAN54	hap10
96	Jre-DownloadIRAN55	hap10
97	Jre-DownloadIRAN56	hap17
98	Jre-DownloadIRAN57	hap10
99	Jre-DownloadIRAN59	hap17
100	Jre-DownloadIRAN60	hap10
101	Jre-DownloadIRAN63	hap17
102	Jre-DownloadIRAN64	hap17
103	Jre-DownloadIRAN65	hap17
104	Jre-DownloadIRAN66	hap10
105	Jre-DownloadIRAN67	hap10
106	Jre-DownloadIRAN68	hap10
107	Jre-DownloadIRAN70	hap10
108	Jre-DownloadIRAN71	hap17
109	Jre-DownloadIRAN72	hap10
110	Jre-DownloadIRAN79	hap10
111	Jre-DownloadIRAN80	hap17
112	Jre-DownloadIRAN81	hap10
113	Jre-DownloadIRAN83	hap17
114	Jre-DownloadIRAN84	hap17
115	Jre-DownloadIRAN85	hap10
116	Jre-DownloadIRAN86	hap10
117	Jre-DownloadIRAN90	hap17
118	Jre-DownloadIRAN93	hap10
119	Jre-DownloadIRAN94	hap10
120	Jre-DownloadIRAN95	hap17
121	Jre-DownloadIRAN96	hap10
122	Jre-DownloadJapan-SIN5	hap10
123	Jre-Pakistan11	hap10
124	Jre-Pakistan3	hap6
125	Jre-Pakistan4	hap10
126	Jre-Pakistan5	hap6
127	Jre-Pakistan7	hap6
128	Jre-Pakistan8	hap10
129	Jre-DownloadpBR-2201	hap10
130	Jre-DownloadpDS-2301	hap10
131	Jre-DownloadpDS-2302	hap10
132	Jre-DownloadpKL-2701	hap8
133	Jre-DownloadpKL-2704	hap8
134	Jre-DownloadpSZ-2805	hap10
135	Jre-DownloadpUD-2507	hap10
136	Jre-DownloadpUD-2508	hap8
137	Jre-DownloadQH11	hap17
138	Jre-DownloadQH12	hap10
139	Jre-DownloadQH14	hap17
140	Jre-DownloadQH17	hap10
141	Jre-DownloadQH23	hap8
142	Jre-DownloadQH24	hap10
143	Jre-DownloadQH25	hap10
144	Jre-DownloadQH26	hap10
145	Jre-DownloadQH30	hap17
146	Jre-DownloadQH32	hap17
147	Jre-DownloadQH34	hap17
148	Jre-DownloadQH35	hap17
149	Jre-DownloadQH36	hap17
150	Jre-DownloadQH37	hap17
151	Jre-DownloadQH39	hap17
152	Jre-DownloadQH40	hap10
153	Jre-DownloadQH41	hap17
154	Jre-DownloadQH42	hap10
155	Jre-DownloadQH43	hap17
156	Jre-DownloadQH44	hap10
157	Jre-DownloadQH46	hap17
158	Jre-DownloadQH47	hap17
159	Jre-DownloadQH48	hap17
160	Jre-DownloadQH50	hap15
161	Jre-DownloadQH51	hap17
162	Jre-DownloadQH52	hap10
163	Jre-DownloadQH53	hap17
164	Jre-DownloadQH55	hap17
165	Jre-DownloadQH57	hap17
166	Jre-DownloadQH58	hap17
167	Jre-DownloadQH59	hap17
168	Jre-DownloadQH60	hap17
169	Jre-DownloadQH61	hap17
170	Jre-DownloadQH62	hap17
171	Jre-DownloadQH64	hap17
172	Jre-DownloadQH65	hap17
173	Jre-DownloadQH66	hap17
174	Jre-DownloadQH68	hap17
175	Jre-DownloadQH70	hap17
176	Jre-DownloadQH71	hap17
177	Jre-DownloadTibet10	hap8
178	Jre-DownloadTibet11	hap8
179	Jre-DownloadTibet12	hap8
180	Jre-DownloadTibet13	hap8
181	Jre-DownloadTibet14	hap8
182	Jre-DownloadTibet15	hap8
183	Jre-DownloadTibet17	hap8
184	Jre-DownloadTibet18	hap8
185	Jre-DownloadTibet20	hap10
186	Jre-DownloadTibet23	hap8
187	Jre-DownloadTibet24	hap8
188	Jre-DownloadTibet26	hap8
189	Jre-DownloadTibet27	hap8
190	Jre-DownloadTibet28	hap8
191	Jre-DownloadTibet29	hap8
192	Jre-DownloadTibet3	hap10
193	Jre-DownloadTibet30	hap8
194	Jre-DownloadTibet31	hap10
195	Jre-DownloadTibet37	hap8
196	Jre-DownloadTibet38	hap10
197	Jre-DownloadTibet39	hap10
198	Jre-DownloadTibet40	hap10
199	Jre-DownloadTibet41	hap10
200	Jre-DownloadTibet42	hap10
201	Jre-DownloadTibet43	hap10
202	Jre-DownloadTibet44	hap8
203	Jre-DownloadTibet47	hap8
204	Jre-DownloadTibet49	hap8
205	Jre-DownloadTibet5	hap8
206	Jre-DownloadTibet52	hap10
207	Jre-DownloadTibet55	hap8
208	Jre-DownloadTibet57	hap10
209	Jre-DownloadTibet59	hap8
210	Jre-DownloadTibet60	hap10
211	Jre-DownloadTibet7	hap10
212	Jre-DownloadTibet81	hap10
213	Jre-DownloadUSA-64057	hap10
214	Jre-DownloadUSA-hart1	hap10
215	Jre-DownloadUSA-IDA1	hap10
216	Jre-DownloadUSA-MARCH	hap10
217	Jre-DownloadUSA-PAYN	hap10
218	Jre-DownloadUSA-SFRA1	hap10
219	Jre-DownloadUSA-SHARK	hap10
220	Jre-DownloadUSA-WAT	hap10
221	Jre-DownloadXJ10	hap10
222	Jre-DownloadXJ12	hap10
223	Jre-DownloadXJ15	hap17
224	Jre-DownloadXJ19	hap10
225	Jre-DownloadXJ24	hap10
226	Jre-DownloadXJ25	hap10
227	Jre-DownloadXJ26	hap17
228	Jre-DownloadXJ29	hap10
229	Jre-DownloadXJ2	hap10
230	Jre-DownloadXJ30	hap10
231	Jre-DownloadXJ31	hap17
232	Jre-DownloadXJ36	hap10
233	Jre-DownloadXJ38	hap17
234	Jre-DownloadXJ39	hap17
235	Jre-DownloadXJ40	hap17
236	Jre-DownloadXJ41	hap17
237	Jre-DownloadXJ42	hap10
238	Jre-DownloadXJ46	hap10
239	Jre-DownloadXJ47	hap10
240	Jre-DownloadXJ48	hap10
241	Jre-DownloadXJ4	hap10
242	Jre-DownloadXJ5	hap17
243	Jre-DownloadXJ6	hap10
244	Jre-DownloadXJ7	hap17
245	Jre-DownloadXJ8	hap17
246	Jre-France-Fra	hap17
247	Jre-France-Mey	hap10
248	Jre-France-Ver	hap10
249	Jre-GL10	hap17
250	Jre-GL36	hap17
251	Jre-GL43	hap17
252	Jre-GL51	hap17
253	Jre-GSPL-SGR01	hap17
254	Jre-GSQY	hap17
255	Jre-GSTS-GQR04	hap17
256	Jre-GSWQ	hap17
257	Jre-GSWW-WLZR05	hap17
258	Jre-HPS17	hap17
259	Jre-HPS25	hap17
260	Jre-HPS4	hap17
261	Jre-HPS9	hap17
262	Jre-HSA13	hap17
263	Jre-HSA14	hap17
264	Jre-HT1	hap10
265	Jre-HT2	hap10
266	Jre-India	hap1
267	Jre-IRAN-7mesh	hap10
268	Jre-IRAN-Bko	hap10
269	Jre-IRAN-Charkhe	hap10
270	Jre-IRAN-Divandarreh	hap10
271	Jre-IRAN-Tab	hap17
272	Jre-IRAN-Tuy	hap10
273	Jre-Iraq-Bko	hap17
274	Jre-Italy1	hap17
275	Jre-Italy25	hap17
276	Jre-Italy4	hap17
277	Jre-Japan-XL	hap17
278	Jre-Korea	hap10
279	Jre-LP133	hap10
280	Jre-LP149	hap10
281	Jre-LP165	hap10
282	Jre-LP241	hap10
283	Jre-LP252	hap10
284	Jre-LP272	hap10
285	Jre-LP705	hap10
286	Jre-LP710	hap10
287	Jre-LS1	hap17
288	Jre-LS2	hap10
289	Jre-LS3	hap17
290	Jre-Lu-land	hap17
291	Jre-Lu-wild	hap17
292	Jre-Nepal	hap10
293	Jre-Nkorea-WJ	hap10
294	Jre-Pakistan-Akr	hap16
295	Jre-Pakistan-Ban	hap10
296	Jre-Pakistan-Kab	hap5
297	Jre-Pakistan-Land	hap9
298	Jre-Pakistan-Rab	hap6
299	Jre-Poland	hap10
300	Jre-QHGD-HXR03	hap17
301	Jre-QHHD-MLZR13	hap10
302	Jre-QHHN-KYR06	hap10
303	Jre-R1	hap10
304	Jre-Romania	hap10
305	Jre-SCJT	hap17
306	Jre-SCMX	hap17
307	Jre-ser25	hap10
308	Jre-ser26	hap10
309	Jre-ser27	hap10
310	Jre-Soviet	hap17
311	Jre-Spain	hap10
312	Jre-SS21	hap17
313	Jre-SSL2	hap10
314	Jre-SSL3	hap10
315	Jre-SSL4	hap10
316	Jre-SSL5	hap10
317	Jre-SSL6	hap10
318	Jre-SSL7	hap10
319	Jre-SSL8	hap10
320	Jre-SSL9	hap10
321	Jre-USA	hap10
322	Jre-VZ989	hap17
323	Jre-XJ-Hongguang	hap17
324	Jre-XZBS1	hap17
325	Jre-XZJC1	hap8
326	Jre-XZJC2	hap7
327	Jre-XZLandrace1	hap8
328	Jre-XZLandrace2	hap10
329	Jre-XZLX1	hap10
330	Jre-XZLX2	hap10
331	Jre-XZLX3	hap8
332	Jre-XZLX4	hap8
333	Jre-XZLZ1	hap10
334	Jre-XZLZ3	hap10
335	Jre-XZLZ4	hap10
336	Jre-XZLZ5	hap17
337	Jre-XZML1	hap8
338	Jre-XZML2	hap8
339	Jre-YC1	hap10
340	Jre-YC2	hap17
341	Jre-YC3	hap17
342	Jre-YC4	hap17
343	Jre-YC5	hap10
344	Jre-YC6	hap17
345	Jre-YC7	hap17
346	Jre-YN-Dayao	hap17
347	Jre-Tajikistan-Dushanbe1	hap17
348	Jre-Tajikistan-Dushanbe2	hap17
349	Jre-Tajikistan-Dushanbe3	hap17
350	Jre-Tajikistan-Dushanbe4	hap17
351	Jre-Tajikistan-Dushanbe5	hap17
352	Jre-AF-BKR05	hap14
353	Jre-IN-BR05	hap12
354	Jre-PK-HSR10	hap13
355	Jre-IN-IDMR01	hap2
356	Jre-IN-IDMR03	hap3
357	Jre-PK-KMR05	hap11
358	Jre-NP-NJP01	hap4

## Sheet: Table S4
Table S4. The allele frequencies of SNPs identified in XP-EHH analysis and located within or ≤5 kb downstream of annotated genes in Juglans regia
Chromosome	SNP_pos	Location_tag	Gene_id	Description	PFAMs	Uniprot	Allele_Freq_CA	Allele_Freq_EA	Allele_Freq_EUR	Allele_Freq_TIB	Allele_Freq_WA	Allele_Freq_SA
chr1	25242373	down5Kb	JreChr01G11061	pectinesterase pectinesterase inhibitor	PMEI,Pectinesterase	Pectinesterase, EC:3.1.1.11	1	1	1	1	1	0.9062
chr1	25242414	down5Kb	JreChr01G11061	pectinesterase pectinesterase inhibitor	PMEI,Pectinesterase	Pectinesterase, EC:3.1.1.11	0.8958	0.9657	1	0.975	0.8725	0.75
chr1	28505629	genic	JreChr01G11211	U11 U12 small nuclear ribonucleoprotein 35 kDa	RRM_1	U11/U12 small nuclear ribonucleoprotein 35 kDa protein-like	1	1	1	1	1	0.9375
chr1	28506017	genic	JreChr01G11211	U11 U12 small nuclear ribonucleoprotein 35 kDa	RRM_1	U11/U12 small nuclear ribonucleoprotein 35 kDa protein-like	1	1	1	1	1	0.9687
chr1	28517013	genic	JreChr01G11211	U11 U12 small nuclear ribonucleoprotein 35 kDa	RRM_1	U11/U12 small nuclear ribonucleoprotein 35 kDa protein-like	1	1	1	1	1	0.9375
chr1	28517029	genic	JreChr01G11211	U11 U12 small nuclear ribonucleoprotein 35 kDa	RRM_1	U11/U12 small nuclear ribonucleoprotein 35 kDa protein-like	1	1	1	1	1	0.9375
chr1	28518555	genic	JreChr01G11211	U11 U12 small nuclear ribonucleoprotein 35 kDa	RRM_1	U11/U12 small nuclear ribonucleoprotein 35 kDa protein-like	1	1	1	1	1	0.9687
chr1	28518559	genic	JreChr01G11211	U11 U12 small nuclear ribonucleoprotein 35 kDa	RRM_1	U11/U12 small nuclear ribonucleoprotein 35 kDa protein-like	1	0.9931	1	1	1	0.9375
chr1	28518603	genic	JreChr01G11211	U11 U12 small nuclear ribonucleoprotein 35 kDa	RRM_1	U11/U12 small nuclear ribonucleoprotein 35 kDa protein-like	1	1	1	1	1	0.9687
chr1	28518666	genic	JreChr01G11211	U11 U12 small nuclear ribonucleoprotein 35 kDa	RRM_1	U11/U12 small nuclear ribonucleoprotein 35 kDa protein-like	1	1	1	1	1	0.9062
chr1	28521905	up5Kb	JreChr01G11211	U11 U12 small nuclear ribonucleoprotein 35 kDa	RRM_1	U11/U12 small nuclear ribonucleoprotein 35 kDa protein-like	1	1	1	1	1	0.9062
chr1	28521914	up5Kb	JreChr01G11211	U11 U12 small nuclear ribonucleoprotein 35 kDa	RRM_1	U11/U12 small nuclear ribonucleoprotein 35 kDa protein-like	1	1	1	1	1	0.9687
chr1	28521933	up5Kb	JreChr01G11211	U11 U12 small nuclear ribonucleoprotein 35 kDa	RRM_1	U11/U12 small nuclear ribonucleoprotein 35 kDa protein-like	1	1	1	1	1	0.9062
chr1	28522450	CDS	JreChr01G11212	-	-	-	1	1	1	1	1	0.9375
chr1	28522568	CDS	JreChr01G11212	-	-	-	1	1	1	1	1	0.9687
chr1	28522580	CDS	JreChr01G11212	-	-	-	1	1	1	1	1	0.9375
chr1	34155845	genic	JreChr01G11533	Serine threonine-protein kinase	Pkinase,Pkinase_Tyr	non-specific serine/threonine protein kinase, EC:2.7.11.1	1	1	0.9615	0.9375	0.9607	0.6875
chr1	34609279	down5Kb	JreChr01G11583	Receptor-like cytosolic serine threonine-protein kinase	Pkinase,Pkinase_Tyr	non-specific serine/threonine protein kinase, EC:2.7.11.1	0.8541	0.952	1	0.95	1	0.625
chr1	34609397	down5Kb	JreChr01G11583	Receptor-like cytosolic serine threonine-protein kinase	Pkinase,Pkinase_Tyr	non-specific serine/threonine protein kinase, EC:2.7.11.1	1	0.9931	1	1	1	0.9687
chr1	34609403	down5Kb	JreChr01G11583	Receptor-like cytosolic serine threonine-protein kinase	Pkinase,Pkinase_Tyr	non-specific serine/threonine protein kinase, EC:2.7.11.1	0.8125	0.2876	0.9615	0.9375	0.9019	0.2812
chr1	34609404	down5Kb	JreChr01G11583	Receptor-like cytosolic serine threonine-protein kinase	Pkinase,Pkinase_Tyr	non-specific serine/threonine protein kinase, EC:2.7.11.1	0.8229	0.9931	0.1538	0.5625	0.4901	1
chr1	34609426	down5Kb	JreChr01G11583	Receptor-like cytosolic serine threonine-protein kinase	Pkinase,Pkinase_Tyr	non-specific serine/threonine protein kinase, EC:2.7.11.1	0.8125	0.9452	1	0.95	0.9509	0.5625
chr1	34609441	down5Kb	JreChr01G11583	Receptor-like cytosolic serine threonine-protein kinase	Pkinase,Pkinase_Tyr	non-specific serine/threonine protein kinase, EC:2.7.11.1	0.8541	0.952	1	0.95	1	0.625
chr1	34609460	down5Kb	JreChr01G11583	Receptor-like cytosolic serine threonine-protein kinase	Pkinase,Pkinase_Tyr	non-specific serine/threonine protein kinase, EC:2.7.11.1	1	0.9931	1	1	1	0.9375
chr1	34609461	down5Kb	JreChr01G11583	Receptor-like cytosolic serine threonine-protein kinase	Pkinase,Pkinase_Tyr	non-specific serine/threonine protein kinase, EC:2.7.11.1	0.8125	0.9452	1	0.95	0.9509	0.5625
chr1	34609482	down5Kb	JreChr01G11583	Receptor-like cytosolic serine threonine-protein kinase	Pkinase,Pkinase_Tyr	non-specific serine/threonine protein kinase, EC:2.7.11.1	1	0.9931	1	1	1	0.9687
chr1	34609487	down5Kb	JreChr01G11583	Receptor-like cytosolic serine threonine-protein kinase	Pkinase,Pkinase_Tyr	non-specific serine/threonine protein kinase, EC:2.7.11.1	0.8125	0.952	1	0.95	0.9411	0.5937
chr1	34609523	down5Kb	JreChr01G11583	Receptor-like cytosolic serine threonine-protein kinase	Pkinase,Pkinase_Tyr	non-specific serine/threonine protein kinase, EC:2.7.11.1	1	0.9931	1	1	1	0.9687
chr1	34609534	down5Kb	JreChr01G11583	Receptor-like cytosolic serine threonine-protein kinase	Pkinase,Pkinase_Tyr	non-specific serine/threonine protein kinase, EC:2.7.11.1	1	0.9931	1	1	1	0.9687
chr1	34609536	down5Kb	JreChr01G11583	Receptor-like cytosolic serine threonine-protein kinase	Pkinase,Pkinase_Tyr	non-specific serine/threonine protein kinase, EC:2.7.11.1	1	0.9931	1	1	1	0.9687
chr1	34609549	down5Kb	JreChr01G11583	Receptor-like cytosolic serine threonine-protein kinase	Pkinase,Pkinase_Tyr	non-specific serine/threonine protein kinase, EC:2.7.11.1	1	0.9931	1	1	1	0.9375
chr1	34609552	down5Kb	JreChr01G11583	Receptor-like cytosolic serine threonine-protein kinase	Pkinase,Pkinase_Tyr	non-specific serine/threonine protein kinase, EC:2.7.11.1	1	1	1	1	1	0.9375
chr1	34609556	down5Kb	JreChr01G11583	Receptor-like cytosolic serine threonine-protein kinase	Pkinase,Pkinase_Tyr	non-specific serine/threonine protein kinase, EC:2.7.11.1	0.9687	1	1	1	1	0.7187
chr1	34609557	down5Kb	JreChr01G11583	Receptor-like cytosolic serine threonine-protein kinase	Pkinase,Pkinase_Tyr	non-specific serine/threonine protein kinase, EC:2.7.11.1	1	0.9931	1	1	1	0.9687
chr1	34609596	down5Kb	JreChr01G11583	Receptor-like cytosolic serine threonine-protein kinase	Pkinase,Pkinase_Tyr	non-specific serine/threonine protein kinase, EC:2.7.11.1	1	0.9931	1	1	1	0.9687
chr1	34609603	down5Kb	JreChr01G11583	Receptor-like cytosolic serine threonine-protein kinase	Pkinase,Pkinase_Tyr	non-specific serine/threonine protein kinase, EC:2.7.11.1	1	0.9931	1	1	1	0.9687
chr1	34609605	down5Kb	JreChr01G11583	Receptor-like cytosolic serine threonine-protein kinase	Pkinase,Pkinase_Tyr	non-specific serine/threonine protein kinase, EC:2.7.11.1	0.8333	0.9452	1	0.95	0.9509	0.5625
chr1	34609610	down5Kb	JreChr01G11583	Receptor-like cytosolic serine threonine-protein kinase	Pkinase,Pkinase_Tyr	non-specific serine/threonine protein kinase, EC:2.7.11.1	1	0.9931	1	1	1	0.9687
chr1	34609723	down5Kb	JreChr01G11583	Receptor-like cytosolic serine threonine-protein kinase	Pkinase,Pkinase_Tyr	non-specific serine/threonine protein kinase, EC:2.7.11.1	0.8333	0.9383	1	0.95	0.9509	0.625
chr1	34609742	down5Kb	JreChr01G11583	Receptor-like cytosolic serine threonine-protein kinase	Pkinase,Pkinase_Tyr	non-specific serine/threonine protein kinase, EC:2.7.11.1	1	0.9931	1	1	1	0.9687
chr1	34609745	down5Kb	JreChr01G11583	Receptor-like cytosolic serine threonine-protein kinase	Pkinase,Pkinase_Tyr	non-specific serine/threonine protein kinase, EC:2.7.11.1	1	1	1	1	1	0.9687
chr1	34609861	down5Kb	JreChr01G11583	Receptor-like cytosolic serine threonine-protein kinase	Pkinase,Pkinase_Tyr	non-specific serine/threonine protein kinase, EC:2.7.11.1	1	0.9863	1	1	1	0.9687
chr1	34609894	down5Kb	JreChr01G11583	Receptor-like cytosolic serine threonine-protein kinase	Pkinase,Pkinase_Tyr	non-specific serine/threonine protein kinase, EC:2.7.11.1	0.8229	0.952	1	0.95	0.9509	0.5937
chr1	34609941	down5Kb	JreChr01G11583	Receptor-like cytosolic serine threonine-protein kinase	Pkinase,Pkinase_Tyr	non-specific serine/threonine protein kinase, EC:2.7.11.1	0.8333	0.952	1	0.9375	0.8823	0.5937
chr1	34610045	down5Kb	JreChr01G11583	Receptor-like cytosolic serine threonine-protein kinase	Pkinase,Pkinase_Tyr	non-specific serine/threonine protein kinase, EC:2.7.11.1	0.8125	0.952	1	0.95	0.9509	0.5937
chr1	34610122	down5Kb	JreChr01G11583	Receptor-like cytosolic serine threonine-protein kinase	Pkinase,Pkinase_Tyr	non-specific serine/threonine protein kinase, EC:2.7.11.1	1	0.9931	1	1	1	0.9687
chr1	34610156	down5Kb	JreChr01G11583	Receptor-like cytosolic serine threonine-protein kinase	Pkinase,Pkinase_Tyr	non-specific serine/threonine protein kinase, EC:2.7.11.1	1	1	1	1	1	0.9687
chr1	34610157	down5Kb	JreChr01G11583	Receptor-like cytosolic serine threonine-protein kinase	Pkinase,Pkinase_Tyr	non-specific serine/threonine protein kinase, EC:2.7.11.1	0.8125	0.9383	1	0.95	0.9509	0.5625
chr1	34610173	down5Kb	JreChr01G11583	Receptor-like cytosolic serine threonine-protein kinase	Pkinase,Pkinase_Tyr	non-specific serine/threonine protein kinase, EC:2.7.11.1	1	0.9931	1	1	1	0.9687
chr1	34610181	down5Kb	JreChr01G11583	Receptor-like cytosolic serine threonine-protein kinase	Pkinase,Pkinase_Tyr	non-specific serine/threonine protein kinase, EC:2.7.11.1	0.8125	0.9452	1	0.95	0.9509	0.5937
chr1	34610182	down5Kb	JreChr01G11583	Receptor-like cytosolic serine threonine-protein kinase	Pkinase,Pkinase_Tyr	non-specific serine/threonine protein kinase, EC:2.7.11.1	1	0.9931	1	1	1	0.9687
chr1	34610187	down5Kb	JreChr01G11583	Receptor-like cytosolic serine threonine-protein kinase	Pkinase,Pkinase_Tyr	non-specific serine/threonine protein kinase, EC:2.7.11.1	0.8125	0.3013	0.9615	0.95	0.9019	0.2812
chr10	13800679	genic	JreChr10G10278	LRR receptor-like serine threonine-protein kinase	LRRNT_2,LRR_1,LRR_8,Pkinase,Pkinase_Tyr	non-specific serine/threonine protein kinase, EC:2.7.11.1	1	1	1	1	0.9411	0.875
chr10	13808180	genic	JreChr10G10278	LRR receptor-like serine threonine-protein kinase	LRRNT_2,LRR_1,LRR_8,Pkinase,Pkinase_Tyr	non-specific serine/threonine protein kinase, EC:2.7.11.1	0.1666	0.0205	0.1346	0.4875	0.5	0.5625
chr10	13808185	genic	JreChr10G10278	LRR receptor-like serine threonine-protein kinase	LRRNT_2,LRR_1,LRR_8,Pkinase,Pkinase_Tyr	non-specific serine/threonine protein kinase, EC:2.7.11.1	0.9895	1	1	0.9875	0.9803	0.9375
chr10	13808189	genic	JreChr10G10278	LRR receptor-like serine threonine-protein kinase	LRRNT_2,LRR_1,LRR_8,Pkinase,Pkinase_Tyr	non-specific serine/threonine protein kinase, EC:2.7.11.1	0.9895	1	1	0.9875	0.9803	0.9375
chr10	13808191	genic	JreChr10G10278	LRR receptor-like serine threonine-protein kinase	LRRNT_2,LRR_1,LRR_8,Pkinase,Pkinase_Tyr	non-specific serine/threonine protein kinase, EC:2.7.11.1	0.9895	1	1	0.9875	0.9803	0.8437
chr10	13808207	genic	JreChr10G10278	LRR receptor-like serine threonine-protein kinase	LRRNT_2,LRR_1,LRR_8,Pkinase,Pkinase_Tyr	non-specific serine/threonine protein kinase, EC:2.7.11.1	0.9895	1	1	0.975	0.9803	0.8437
chr10	13808211	genic	JreChr10G10278	LRR receptor-like serine threonine-protein kinase	LRRNT_2,LRR_1,LRR_8,Pkinase,Pkinase_Tyr	non-specific serine/threonine protein kinase, EC:2.7.11.1	0.9895	1	1	0.9875	0.9803	0.8437
chr10	13808220	genic	JreChr10G10278	LRR receptor-like serine threonine-protein kinase	LRRNT_2,LRR_1,LRR_8,Pkinase,Pkinase_Tyr	non-specific serine/threonine protein kinase, EC:2.7.11.1	0.9895	1	1	0.9875	0.9117	0.5937
chr10	13808227	genic	JreChr10G10278	LRR receptor-like serine threonine-protein kinase	LRRNT_2,LRR_1,LRR_8,Pkinase,Pkinase_Tyr	non-specific serine/threonine protein kinase, EC:2.7.11.1	1	1	1	1	0.9901	0.9375
chr10	13808228	genic	JreChr10G10278	LRR receptor-like serine threonine-protein kinase	LRRNT_2,LRR_1,LRR_8,Pkinase,Pkinase_Tyr	non-specific serine/threonine protein kinase, EC:2.7.11.1	1	1	1	1	0.9901	0.9375
chr10	13808253	genic	JreChr10G10278	LRR receptor-like serine threonine-protein kinase	LRRNT_2,LRR_1,LRR_8,Pkinase,Pkinase_Tyr	non-specific serine/threonine protein kinase, EC:2.7.11.1	1	1	1	1	1	0.9687
chr10	13808254	genic	JreChr10G10278	LRR receptor-like serine threonine-protein kinase	LRRNT_2,LRR_1,LRR_8,Pkinase,Pkinase_Tyr	non-specific serine/threonine protein kinase, EC:2.7.11.1	1	1	1	1	1	0.9062
chr10	13808256	genic	JreChr10G10278	LRR receptor-like serine threonine-protein kinase	LRRNT_2,LRR_1,LRR_8,Pkinase,Pkinase_Tyr	non-specific serine/threonine protein kinase, EC:2.7.11.1	0.9895	1	1	0.9875	0.9803	0.75
chr10	13808257	genic	JreChr10G10278	LRR receptor-like serine threonine-protein kinase	LRRNT_2,LRR_1,LRR_8,Pkinase,Pkinase_Tyr	non-specific serine/threonine protein kinase, EC:2.7.11.1	0.9895	1	1	0.9875	0.9803	0.8125
chr10	13808477	genic	JreChr10G10278	LRR receptor-like serine threonine-protein kinase	LRRNT_2,LRR_1,LRR_8,Pkinase,Pkinase_Tyr	non-specific serine/threonine protein kinase, EC:2.7.11.1	0.177	0.0205	0.1153	0.475	0.3431	0.5312
chr10	13808547	genic	JreChr10G10278	LRR receptor-like serine threonine-protein kinase	LRRNT_2,LRR_1,LRR_8,Pkinase,Pkinase_Tyr	non-specific serine/threonine protein kinase, EC:2.7.11.1	1	1	1	1	0.9313	0.875
chr10	13935728	genic	JreChr10G10278	LRR receptor-like serine threonine-protein kinase	LRRNT_2,LRR_1,LRR_8,Pkinase,Pkinase_Tyr	non-specific serine/threonine protein kinase, EC:2.7.11.1	0.9687	0.9931	1	0.85	0.9901	0.75
chr10	13935739	genic	JreChr10G10278	LRR receptor-like serine threonine-protein kinase	LRRNT_2,LRR_1,LRR_8,Pkinase,Pkinase_Tyr	non-specific serine/threonine protein kinase, EC:2.7.11.1	0.9166	0.9726	1	0.825	0.9607	0.6562
chr10	13935746	genic	JreChr10G10278	LRR receptor-like serine threonine-protein kinase	LRRNT_2,LRR_1,LRR_8,Pkinase,Pkinase_Tyr	non-specific serine/threonine protein kinase, EC:2.7.11.1	0.9375	0.9794	1	0.9875	0.9705	0.9062
chr10	13935750	genic	JreChr10G10278	LRR receptor-like serine threonine-protein kinase	LRRNT_2,LRR_1,LRR_8,Pkinase,Pkinase_Tyr	non-specific serine/threonine protein kinase, EC:2.7.11.1	1	1	1	1	1	0.875
chr10	13935786	genic	JreChr10G10278	LRR receptor-like serine threonine-protein kinase	LRRNT_2,LRR_1,LRR_8,Pkinase,Pkinase_Tyr	non-specific serine/threonine protein kinase, EC:2.7.11.1	0.8125	0.9383	1	0.7625	0.9117	0.6875
chr10	13936238	genic	JreChr10G10278	LRR receptor-like serine threonine-protein kinase	LRRNT_2,LRR_1,LRR_8,Pkinase,Pkinase_Tyr	non-specific serine/threonine protein kinase, EC:2.7.11.1	0.8333	0.9726	1	1	0.7843	0.5312
chr10	13936249	genic	JreChr10G10278	LRR receptor-like serine threonine-protein kinase	LRRNT_2,LRR_1,LRR_8,Pkinase,Pkinase_Tyr	non-specific serine/threonine protein kinase, EC:2.7.11.1	0.9895	0.9931	1	1	1	0.9062
chr10	13936272	genic	JreChr10G10278	LRR receptor-like serine threonine-protein kinase	LRRNT_2,LRR_1,LRR_8,Pkinase,Pkinase_Tyr	non-specific serine/threonine protein kinase, EC:2.7.11.1	1	0.9931	1	1	1	0.8437
chr10	13936276	genic	JreChr10G10278	LRR receptor-like serine threonine-protein kinase	LRRNT_2,LRR_1,LRR_8,Pkinase,Pkinase_Tyr	non-specific serine/threonine protein kinase, EC:2.7.11.1	1	0.9931	1	1	1	0.8437
chr10	13936290	genic	JreChr10G10278	LRR receptor-like serine threonine-protein kinase	LRRNT_2,LRR_1,LRR_8,Pkinase,Pkinase_Tyr	non-specific serine/threonine protein kinase, EC:2.7.11.1	0.9895	0.9931	1	1	1	0.875
chr10	13936335	genic	JreChr10G10278	LRR receptor-like serine threonine-protein kinase	LRRNT_2,LRR_1,LRR_8,Pkinase,Pkinase_Tyr	non-specific serine/threonine protein kinase, EC:2.7.11.1	1	1	1	1	1	0.9062
chr10	13936361	genic	JreChr10G10278	LRR receptor-like serine threonine-protein kinase	LRRNT_2,LRR_1,LRR_8,Pkinase,Pkinase_Tyr	non-specific serine/threonine protein kinase, EC:2.7.11.1	1	1	1	1	1	0.875
chr10	13936370	genic	JreChr10G10278	LRR receptor-like serine threonine-protein kinase	LRRNT_2,LRR_1,LRR_8,Pkinase,Pkinase_Tyr	non-specific serine/threonine protein kinase, EC:2.7.11.1	1	1	1	1	1	0.875
chr10	13936376	genic	JreChr10G10278	LRR receptor-like serine threonine-protein kinase	LRRNT_2,LRR_1,LRR_8,Pkinase,Pkinase_Tyr	non-specific serine/threonine protein kinase, EC:2.7.11.1	0.9687	0.9863	1	0.9875	1	0.875
chr10	13936454	genic	JreChr10G10278	LRR receptor-like serine threonine-protein kinase	LRRNT_2,LRR_1,LRR_8,Pkinase,Pkinase_Tyr	non-specific serine/threonine protein kinase, EC:2.7.11.1	0.8229	0.9726	1	1	0.7941	0.5937
chr10	13936478	genic	JreChr10G10278	LRR receptor-like serine threonine-protein kinase	LRRNT_2,LRR_1,LRR_8,Pkinase,Pkinase_Tyr	non-specific serine/threonine protein kinase, EC:2.7.11.1	0.9895	1	1	1	0.9901	0.7812
chr10	13936509	genic	JreChr10G10278	LRR receptor-like serine threonine-protein kinase	LRRNT_2,LRR_1,LRR_8,Pkinase,Pkinase_Tyr	non-specific serine/threonine protein kinase, EC:2.7.11.1	1	1	1	1	0.8921	0.8437
chr10	13936570	genic	JreChr10G10278	LRR receptor-like serine threonine-protein kinase	LRRNT_2,LRR_1,LRR_8,Pkinase,Pkinase_Tyr	non-specific serine/threonine protein kinase, EC:2.7.11.1	0.8333	0.9726	1	1	0.7843	0.5625
chr10	13936581	genic	JreChr10G10278	LRR receptor-like serine threonine-protein kinase	LRRNT_2,LRR_1,LRR_8,Pkinase,Pkinase_Tyr	non-specific serine/threonine protein kinase, EC:2.7.11.1	0.8333	0.9726	1	1	0.7843	0.5625
chr10	13936663	genic	JreChr10G10278	LRR receptor-like serine threonine-protein kinase	LRRNT_2,LRR_1,LRR_8,Pkinase,Pkinase_Tyr	non-specific serine/threonine protein kinase, EC:2.7.11.1	0.9895	1	1	1	0.9901	0.8125
chr10	13936937	genic	JreChr10G10278	LRR receptor-like serine threonine-protein kinase	LRRNT_2,LRR_1,LRR_8,Pkinase,Pkinase_Tyr	non-specific serine/threonine protein kinase, EC:2.7.11.1	0.7708	0.9726	1	0.975	0.7745	0.5
chr10	18197540	down5Kb	JreChr10G10535	synthase	Terpene_synth,Terpene_synth_C	(3S,6E)-nerolidol synthase 1-like	0.9895	1	0.9807	0.9875	1	0.9062
chr10	18197550	down5Kb	JreChr10G10535	synthase	Terpene_synth,Terpene_synth_C	(3S,6E)-nerolidol synthase 1-like	0.9375	0.678	1	0.925	0.8333	0.6562
chr10	18197634	down5Kb	JreChr10G10535	synthase	Terpene_synth,Terpene_synth_C	(3S,6E)-nerolidol synthase 1-like	0.9791	0.9863	1	1	1	0.9687
chr10	21374522	up5Kb	JreChr10G10731	Ubiquitin system component Cue protein	CUE	CUE domain-containing protein	0.5208	0.3835	0.3461	0.7375	0.5294	0.8437
chr10	21374526	up5Kb	JreChr10G10731	Ubiquitin system component Cue protein	CUE	CUE domain-containing protein	1	1	1	1	1	0.9687
chr10	21374534	up5Kb	JreChr10G10731	Ubiquitin system component Cue protein	CUE	CUE domain-containing protein	1	1	1	1	1	0.875
chr10	21374535	up5Kb	JreChr10G10731	Ubiquitin system component Cue protein	CUE	CUE domain-containing protein	0.9791	1	1	1	1	0.6875
chr10	21374546	up5Kb	JreChr10G10731	Ubiquitin system component Cue protein	CUE	CUE domain-containing protein	1	1	1	1	0.9901	0.9687
chr10	21374555	up5Kb	JreChr10G10731	Ubiquitin system component Cue protein	CUE	CUE domain-containing protein	0.9791	1	1	1	1	0.6875
chr10	21374563	up5Kb	JreChr10G10731	Ubiquitin system component Cue protein	CUE	CUE domain-containing protein	1	1	1	1	1	0.9687
chr10	21374579	up5Kb	JreChr10G10731	Ubiquitin system component Cue protein	CUE	CUE domain-containing protein	0.9791	1	1	1	1	0.6875
chr10	21374580	up5Kb	JreChr10G10731	Ubiquitin system component Cue protein	CUE	CUE domain-containing protein	0.9791	1	1	1	1	0.6875
chr10	21374586	up5Kb	JreChr10G10731	Ubiquitin system component Cue protein	CUE	CUE domain-containing protein	0.9791	1	1	1	1	0.6875
chr10	21374593	up5Kb	JreChr10G10731	Ubiquitin system component Cue protein	CUE	CUE domain-containing protein	0.9791	1	1	1	1	0.6875
chr11	4840455	up5Kb	JreChr11G12281	Belongs to the protein kinase superfamily. Ser Thr protein kinase family	LRRNT_2,LRR_1,LRR_8,Pkinase,Pkinase_Tyr	LRR receptor-like serine/threonine-protein kinase FEI 2	0.9583	1	1	0.925	0.8921	0.8437
chr11	4841354	up5Kb	JreChr11G12281	Belongs to the protein kinase superfamily. Ser Thr protein kinase family	LRRNT_2,LRR_1,LRR_8,Pkinase,Pkinase_Tyr	LRR receptor-like serine/threonine-protein kinase FEI 2	1	1	1	1	0.9509	0.75
chr11	4850433	down5Kb	JreChr11G12281	Belongs to the protein kinase superfamily. Ser Thr protein kinase family	LRRNT_2,LRR_1,LRR_8,Pkinase,Pkinase_Tyr	LRR receptor-like serine/threonine-protein kinase FEI 2	0.5833	0.2328	0.5	0.35	0.4215	0.75
chr11	4850652	down5Kb	JreChr11G12281	Belongs to the protein kinase superfamily. Ser Thr protein kinase family	LRRNT_2,LRR_1,LRR_8,Pkinase,Pkinase_Tyr	LRR receptor-like serine/threonine-protein kinase FEI 2	0.5729	0.2397	0.5	0.4375	0.4411	0.75
chr11	4850695	down5Kb	JreChr11G12281	Belongs to the protein kinase superfamily. Ser Thr protein kinase family	LRRNT_2,LRR_1,LRR_8,Pkinase,Pkinase_Tyr	LRR receptor-like serine/threonine-protein kinase FEI 2	0.9791	1	1	1	0.9509	0.8437
chr11	4851890	down5Kb	JreChr11G12281	Belongs to the protein kinase superfamily. Ser Thr protein kinase family	LRRNT_2,LRR_1,LRR_8,Pkinase,Pkinase_Tyr	LRR receptor-like serine/threonine-protein kinase FEI 2	1	1	1	0.9125	0.8725	0.6562
chr11	4851896	down5Kb	JreChr11G12281	Belongs to the protein kinase superfamily. Ser Thr protein kinase family	LRRNT_2,LRR_1,LRR_8,Pkinase,Pkinase_Tyr	LRR receptor-like serine/threonine-protein kinase FEI 2	1	1	1	0.9125	0.9313	0.8437
chr11	4851909	down5Kb	JreChr11G12281	Belongs to the protein kinase superfamily. Ser Thr protein kinase family	LRRNT_2,LRR_1,LRR_8,Pkinase,Pkinase_Tyr	LRR receptor-like serine/threonine-protein kinase FEI 2	1	1	1	0.9125	0.8725	0.625
chr11	4851966	down5Kb	JreChr11G12281	Belongs to the protein kinase superfamily. Ser Thr protein kinase family	LRRNT_2,LRR_1,LRR_8,Pkinase,Pkinase_Tyr	LRR receptor-like serine/threonine-protein kinase FEI 2	1	1	1	0.9125	0.8725	0.6562
chr11	4851969	down5Kb	JreChr11G12281	Belongs to the protein kinase superfamily. Ser Thr protein kinase family	LRRNT_2,LRR_1,LRR_8,Pkinase,Pkinase_Tyr	LRR receptor-like serine/threonine-protein kinase FEI 2	1	1	1	0.9125	0.8725	0.6562
chr11	4851981	down5Kb	JreChr11G12281	Belongs to the protein kinase superfamily. Ser Thr protein kinase family	LRRNT_2,LRR_1,LRR_8,Pkinase,Pkinase_Tyr	LRR receptor-like serine/threonine-protein kinase FEI 2	1	1	1	1	1	0.9687
chr11	4851994	down5Kb	JreChr11G12281	Belongs to the protein kinase superfamily. Ser Thr protein kinase family	LRRNT_2,LRR_1,LRR_8,Pkinase,Pkinase_Tyr	LRR receptor-like serine/threonine-protein kinase FEI 2	0.5729	0.2328	0.5	0.4125	0.4313	0.7187
chr11	4852019	down5Kb	JreChr11G12281	Belongs to the protein kinase superfamily. Ser Thr protein kinase family	LRRNT_2,LRR_1,LRR_8,Pkinase,Pkinase_Tyr	LRR receptor-like serine/threonine-protein kinase FEI 2	1	1	1	0.9125	0.8725	0.6562
chr11	4852043	down5Kb	JreChr11G12281	Belongs to the protein kinase superfamily. Ser Thr protein kinase family	LRRNT_2,LRR_1,LRR_8,Pkinase,Pkinase_Tyr	LRR receptor-like serine/threonine-protein kinase FEI 2	0.1979	0	0	0.3125	0.3039	0.5312
chr11	4852052	down5Kb	JreChr11G12281	Belongs to the protein kinase superfamily. Ser Thr protein kinase family	LRRNT_2,LRR_1,LRR_8,Pkinase,Pkinase_Tyr	LRR receptor-like serine/threonine-protein kinase FEI 2	0.1979	0	0	0.3125	0.3039	0.5312
chr11	4852170	down5Kb	JreChr11G12281	Belongs to the protein kinase superfamily. Ser Thr protein kinase family	LRRNT_2,LRR_1,LRR_8,Pkinase,Pkinase_Tyr	LRR receptor-like serine/threonine-protein kinase FEI 2	1	1	1	0.9125	0.8725	0.6875
chr11	4852206	down5Kb	JreChr11G12281	Belongs to the protein kinase superfamily. Ser Thr protein kinase family	LRRNT_2,LRR_1,LRR_8,Pkinase,Pkinase_Tyr	LRR receptor-like serine/threonine-protein kinase FEI 2	0.1979	0	0	0.3125	0.3039	0.5312
chr11	4852219	down5Kb	JreChr11G12281	Belongs to the protein kinase superfamily. Ser Thr protein kinase family	LRRNT_2,LRR_1,LRR_8,Pkinase,Pkinase_Tyr	LRR receptor-like serine/threonine-protein kinase FEI 2	1	1	1	0.9125	0.8725	0.6562
chr11	4852287	down5Kb	JreChr11G12281	Belongs to the protein kinase superfamily. Ser Thr protein kinase family	LRRNT_2,LRR_1,LRR_8,Pkinase,Pkinase_Tyr	LRR receptor-like serine/threonine-protein kinase FEI 2	0.5729	0.2397	0.5	0.4375	0.4313	0.7187
chr11	4852301	down5Kb	JreChr11G12281	Belongs to the protein kinase superfamily. Ser Thr protein kinase family	LRRNT_2,LRR_1,LRR_8,Pkinase,Pkinase_Tyr	LRR receptor-like serine/threonine-protein kinase FEI 2	0.1979	0	0	0.3125	0.3039	0.5312
chr11	4852357	down5Kb	JreChr11G12281	Belongs to the protein kinase superfamily. Ser Thr protein kinase family	LRRNT_2,LRR_1,LRR_8,Pkinase,Pkinase_Tyr	LRR receptor-like serine/threonine-protein kinase FEI 2	1	1	1	0.9125	0.8725	0.6562
chr11	4852359	down5Kb	JreChr11G12281	Belongs to the protein kinase superfamily. Ser Thr protein kinase family	LRRNT_2,LRR_1,LRR_8,Pkinase,Pkinase_Tyr	LRR receptor-like serine/threonine-protein kinase FEI 2	0.9687	1	1	1	0.9607	0.8437
chr11	4852391	down5Kb	JreChr11G12281	Belongs to the protein kinase superfamily. Ser Thr protein kinase family	LRRNT_2,LRR_1,LRR_8,Pkinase,Pkinase_Tyr	LRR receptor-like serine/threonine-protein kinase FEI 2	1	1	1	0.9125	0.8725	0.6562
chr11	4852394	down5Kb	JreChr11G12281	Belongs to the protein kinase superfamily. Ser Thr protein kinase family	LRRNT_2,LRR_1,LRR_8,Pkinase,Pkinase_Tyr	LRR receptor-like serine/threonine-protein kinase FEI 2	0.2083	0	0	0.2125	0.1764	0.2187
chr11	4852395	down5Kb	JreChr11G12281	Belongs to the protein kinase superfamily. Ser Thr protein kinase family	LRRNT_2,LRR_1,LRR_8,Pkinase,Pkinase_Tyr	LRR receptor-like serine/threonine-protein kinase FEI 2	0.2083	0	0	0.3125	0.245	0.375
chr11	4852407	down5Kb	JreChr11G12281	Belongs to the protein kinase superfamily. Ser Thr protein kinase family	LRRNT_2,LRR_1,LRR_8,Pkinase,Pkinase_Tyr	LRR receptor-like serine/threonine-protein kinase FEI 2	1	1	1	1	1	0.9687
chr11	4852410	down5Kb	JreChr11G12281	Belongs to the protein kinase superfamily. Ser Thr protein kinase family	LRRNT_2,LRR_1,LRR_8,Pkinase,Pkinase_Tyr	LRR receptor-like serine/threonine-protein kinase FEI 2	0.1979	0	0	0.2125	0.1764	0.2187
chr11	4852429	down5Kb	JreChr11G12281	Belongs to the protein kinase superfamily. Ser Thr protein kinase family	LRRNT_2,LRR_1,LRR_8,Pkinase,Pkinase_Tyr	LRR receptor-like serine/threonine-protein kinase FEI 2	0.2083	0	0	0.2125	0.1764	0.2187
chr11	4852468	down5Kb	JreChr11G12281	Belongs to the protein kinase superfamily. Ser Thr protein kinase family	LRRNT_2,LRR_1,LRR_8,Pkinase,Pkinase_Tyr	LRR receptor-like serine/threonine-protein kinase FEI 2	0.5729	0.2328	0.5	0.4125	0.4313	0.75
chr11	4852484	down5Kb	JreChr11G12281	Belongs to the protein kinase superfamily. Ser Thr protein kinase family	LRRNT_2,LRR_1,LRR_8,Pkinase,Pkinase_Tyr	LRR receptor-like serine/threonine-protein kinase FEI 2	0.1979	0	0	0.3	0.3039	0.5625
chr11	4852502	down5Kb	JreChr11G12281	Belongs to the protein kinase superfamily. Ser Thr protein kinase family	LRRNT_2,LRR_1,LRR_8,Pkinase,Pkinase_Tyr	LRR receptor-like serine/threonine-protein kinase FEI 2	1	1	1	1	0.9411	0.8125
chr11	4852507	down5Kb	JreChr11G12281	Belongs to the protein kinase superfamily. Ser Thr protein kinase family	LRRNT_2,LRR_1,LRR_8,Pkinase,Pkinase_Tyr	LRR receptor-like serine/threonine-protein kinase FEI 2	1	1	1	1	1	0.9687
chr11	4865905	up5Kb	JreChr11G12283	Dehydrogenase	adh_short_C2	(+)-cis,trans-nepetalactol synthase NEPS1-like	0.9583	0.9931	1	0.9625	0.9509	0.7187
chr11	4865906	up5Kb	JreChr11G12283	Dehydrogenase	adh_short_C2	(+)-cis,trans-nepetalactol synthase NEPS1-like	1	1	1	1	1	0.9375
chr11	4865949	up5Kb	JreChr11G12283	Dehydrogenase	adh_short_C2	(+)-cis,trans-nepetalactol synthase NEPS1-like	1	1	1	1	0.9411	0.8125
chr11	4865950	up5Kb	JreChr11G12283	Dehydrogenase	adh_short_C2	(+)-cis,trans-nepetalactol synthase NEPS1-like	1	1	1	1	0.9411	0.8125
chr11	4865956	up5Kb	JreChr11G12283	Dehydrogenase	adh_short_C2	(+)-cis,trans-nepetalactol synthase NEPS1-like	0.9687	1	1	1	0.9607	0.75
chr11	4865957	up5Kb	JreChr11G12283	Dehydrogenase	adh_short_C2	(+)-cis,trans-nepetalactol synthase NEPS1-like	0.9687	1	1	0.8375	0.8333	0.4687
chr11	4865982	up5Kb	JreChr11G12283	Dehydrogenase	adh_short_C2	(+)-cis,trans-nepetalactol synthase NEPS1-like	0.9583	1	1	0.975	0.9607	0.6875
chr11	4865997	up5Kb	JreChr11G12283	Dehydrogenase	adh_short_C2	(+)-cis,trans-nepetalactol synthase NEPS1-like	1	1	1	1	1	0.9062
chr11	4866029	up5Kb	JreChr11G12283	Dehydrogenase	adh_short_C2	(+)-cis,trans-nepetalactol synthase NEPS1-like	1	1	1	1	0.9411	0.7812
chr11	4866041	up5Kb	JreChr11G12283	Dehydrogenase	adh_short_C2	(+)-cis,trans-nepetalactol synthase NEPS1-like	1	1	1	1	1	0.8437
chr11	4866046	up5Kb	JreChr11G12283	Dehydrogenase	adh_short_C2	(+)-cis,trans-nepetalactol synthase NEPS1-like	1	1	1	1	0.9411	0.7812
chr11	8208926	CDS	JreChr11G12564	-	-	-	1	1	1	1	1	0.9062
chr11	8843968	up5Kb	JreChr11G12619	-	-	-	0.7916	0.8013	0.4038	0.525	0.7941	0.8437
chr11	8920996	down5Kb	JreChr11G12626	-	-	-	0.6875	1	0.9615	0.8875	0.7647	0.5312
chr11	8920997	down5Kb	JreChr11G12626	-	-	-	0.6875	1	0.9615	0.8875	0.7647	0.5312
chr11	27543638	up5Kb	JreChr11G11074	Belongs to the glycosyltransferase 1 family. Bacterial plant glycogen synthase subfamily	Glyco_transf_5,Glycos_transf_1	Granule-bound starch synthase 1, chloroplastic/amyloplastic, Granule-bound starch synthase I	0.8958	1	1	1	1	0.875
chr11	27543659	up5Kb	JreChr11G11074	Belongs to the glycosyltransferase 1 family. Bacterial plant glycogen synthase subfamily	Glyco_transf_5,Glycos_transf_1	Granule-bound starch synthase 1, chloroplastic/amyloplastic, Granule-bound starch synthase I	0.9895	1	1	1	1	0.9375
chr12	3705143	genic	JreChr12G11610	E3 ubiquitin-protein ligase ORTHRUS	SAD_SRA,zf-C3HC4,zf-C3HC4_3,zf-RING_UBOX	RING-type E3 ubiquitin transferase, EC:2.3.2.27	1	1	0.9807	0.9625	0.9901	0.875
chr12	3705163	genic	JreChr12G11610	E3 ubiquitin-protein ligase ORTHRUS	SAD_SRA,zf-C3HC4,zf-C3HC4_3,zf-RING_UBOX	RING-type E3 ubiquitin transferase, EC:2.3.2.27	1	1	1	1	0.9705	0.9687
chr12	3705205	genic	JreChr12G11610	E3 ubiquitin-protein ligase ORTHRUS	SAD_SRA,zf-C3HC4,zf-C3HC4_3,zf-RING_UBOX	RING-type E3 ubiquitin transferase, EC:2.3.2.27	1	1	0.9807	0.9625	0.9901	0.875
chr12	3705215	genic	JreChr12G11610	E3 ubiquitin-protein ligase ORTHRUS	SAD_SRA,zf-C3HC4,zf-C3HC4_3,zf-RING_UBOX	RING-type E3 ubiquitin transferase, EC:2.3.2.27	1	1	1	1	1	0.9687
chr12	3705216	genic	JreChr12G11610	E3 ubiquitin-protein ligase ORTHRUS	SAD_SRA,zf-C3HC4,zf-C3HC4_3,zf-RING_UBOX	RING-type E3 ubiquitin transferase, EC:2.3.2.27	0.9895	1	1	1	0.9901	0.8437
chr12	3705245	genic	JreChr12G11610	E3 ubiquitin-protein ligase ORTHRUS	SAD_SRA,zf-C3HC4,zf-C3HC4_3,zf-RING_UBOX	RING-type E3 ubiquitin transferase, EC:2.3.2.27	0.9895	0.9931	1	1	1	0.9062
chr12	12090264	down5Kb	JreChr12G10124	-	-	-	1	1	1	0.925	0.8725	0.75
chr13	7076476	down5Kb	JreChr13G11865	DUF1771	DUF1771,Smr	SMR domain-containing protein At5g58720-like isoform X1	0.8645	0.9246	0.9615	1	0.9019	0.5937
chr13	7076854	down5Kb	JreChr13G11865	DUF1771	DUF1771,Smr	SMR domain-containing protein At5g58720-like isoform X1	1	0.9863	0.8269	0.8625	0.6274	0.375
chr13	7076881	down5Kb	JreChr13G11865	DUF1771	DUF1771,Smr	SMR domain-containing protein At5g58720-like isoform X1	1	0.9931	0.8269	0.85	0.6764	0.5937
chr13	7078388	down5Kb	JreChr13G11865	DUF1771	DUF1771,Smr	SMR domain-containing protein At5g58720-like isoform X1	1	0.9863	0.8269	0.7625	0.6274	0.375
chr13	7078390	down5Kb	JreChr13G11865	DUF1771	DUF1771,Smr	SMR domain-containing protein At5g58720-like isoform X1	1	1	1	1	0.9705	0.875
chr13	7078654	down5Kb	JreChr13G11865	DUF1771	DUF1771,Smr	SMR domain-containing protein At5g58720-like isoform X1	1	0.9863	0.8269	0.775	0.6274	0.375
chr13	7079122	down5Kb	JreChr13G11865	DUF1771	DUF1771,Smr	SMR domain-containing protein At5g58720-like isoform X1	1	1	1	1	0.9803	0.8437
chr13	7079133	down5Kb	JreChr13G11865	DUF1771	DUF1771,Smr	SMR domain-containing protein At5g58720-like isoform X1	1	1	1	1	0.9901	0.9375
chr13	7079312	down5Kb	JreChr13G11865	DUF1771	DUF1771,Smr	SMR domain-containing protein At5g58720-like isoform X1	1	0.9863	0.8269	0.7625	0.6274	0.375
chr13	12192343	up5Kb	JreChr13G10180	-	-	-	1	1	0.9807	0.975	0.9509	0.8437
chr13	12192345	up5Kb	JreChr13G10180	-	-	-	1	1	0.9807	0.975	0.9607	0.8437
chr13	12192363	up5Kb	JreChr13G10180	-	-	-	0.9791	1	0.9807	0.9625	0.9411	0.9062
chr13	12192393	up5Kb	JreChr13G10180	-	-	-	1	1	1	1	1	0.9062
chr13	12192396	up5Kb	JreChr13G10180	-	-	-	0.9791	0.9931	0.9807	0.975	0.9411	0.8437
chr13	12192418	up5Kb	JreChr13G10180	-	-	-	0.6458	0.9657	0.8076	0.8875	0.6176	0.4375
chr13	23852772	CDS	JreChr13G10920	Catalytic subunit of the molybdopterin synthase complex, a complex that catalyzes the conversion of precursor Z into molybdopterin. Acts by mediating the incorporation of 2 sulfur atoms from thiocarboxylated MOCS2A into precursor Z to generate a dithiolene group	MoaE	Molybdopterin synthase catalytic subunit, EC:2.8.1.12, Molybdenum cofactor synthesis protein 2 large subunit, Molybdenum cofactor synthesis protein 2B, MOCS2B	1	1	1	1	0.9901	0.9062
chr13	23900710	genic	JreChr13G10922	Proteasome-associated protein ECM29 homolog	Ecm29	Proteasome adapter and scaffold protein ECM29	0.4791	0.2397	0.8076	0.625	0.5098	0.1875
chr13	23903054	genic	JreChr13G10922	Proteasome-associated protein ECM29 homolog	Ecm29	Proteasome adapter and scaffold protein ECM29	1	0.9931	1	1	0.9803	0.875
chr13	23903882	genic	JreChr13G10922	Proteasome-associated protein ECM29 homolog	Ecm29	Proteasome adapter and scaffold protein ECM29	1	1	1	1	1	0.9062
chr13	23903893	genic	JreChr13G10922	Proteasome-associated protein ECM29 homolog	Ecm29	Proteasome adapter and scaffold protein ECM29	0.8125	0.9794	0.8653	0.875	0.8039	0.75
chr13	23904755	genic	JreChr13G10922	Proteasome-associated protein ECM29 homolog	Ecm29	Proteasome adapter and scaffold protein ECM29	1	1	1	1	1	0.9062
chr13	23904760	genic	JreChr13G10922	Proteasome-associated protein ECM29 homolog	Ecm29	Proteasome adapter and scaffold protein ECM29	1	1	1	1	1	0.9062
chr13	23904764	genic	JreChr13G10922	Proteasome-associated protein ECM29 homolog	Ecm29	Proteasome adapter and scaffold protein ECM29	1	1	1	1	0.9803	0.875
chr13	23904772	genic	JreChr13G10922	Proteasome-associated protein ECM29 homolog	Ecm29	Proteasome adapter and scaffold protein ECM29	1	1	1	1	1	0.9375
chr13	23904874	genic	JreChr13G10922	Proteasome-associated protein ECM29 homolog	Ecm29	Proteasome adapter and scaffold protein ECM29	0.677	0.6986	0.8461	0.875	0.7352	0.4375
chr13	23904997	genic	JreChr13G10922	Proteasome-associated protein ECM29 homolog	Ecm29	Proteasome adapter and scaffold protein ECM29	0.677	0.6986	0.8461	0.875	0.7254	0.4062
chr13	23910093	genic	JreChr13G10922	Proteasome-associated protein ECM29 homolog	Ecm29	Proteasome adapter and scaffold protein ECM29	0.8125	0.9863	0.8653	0.875	0.8235	0.7812
chr13	23910153	genic	JreChr13G10922	Proteasome-associated protein ECM29 homolog	Ecm29	Proteasome adapter and scaffold protein ECM29	0.8125	0.9794	0.8653	0.875	0.8039	0.5937
chr13	23910164	genic	JreChr13G10922	Proteasome-associated protein ECM29 homolog	Ecm29	Proteasome adapter and scaffold protein ECM29	1	1	1	1	0.9803	0.875
chr13	23913370	genic	JreChr13G10922	Proteasome-associated protein ECM29 homolog	Ecm29	Proteasome adapter and scaffold protein ECM29	0.677	0.6986	0.8461	0.875	0.7352	0.4375
chr13	23914344	genic	JreChr13G10922	Proteasome-associated protein ECM29 homolog	Ecm29	Proteasome adapter and scaffold protein ECM29	0.6875	0.6986	0.8461	0.875	0.7352	0.4062
chr13	23915523	genic	JreChr13G10922	Proteasome-associated protein ECM29 homolog	Ecm29	Proteasome adapter and scaffold protein ECM29	1	1	1	1	1	0.9375
chr13	23915524	genic	JreChr13G10922	Proteasome-associated protein ECM29 homolog	Ecm29	Proteasome adapter and scaffold protein ECM29	0.6875	0.6986	0.8461	0.875	0.7352	0.4062
chr13	23919416	genic	JreChr13G10922	Proteasome-associated protein ECM29 homolog	Ecm29	Proteasome adapter and scaffold protein ECM29	0.8125	0.9794	0.8653	0.875	0.8039	0.5937
chr14	20760077	down5Kb	JreChr14G10704	cyclin-dependent protein kinase inhibitor	-	Cyclin-dependent protein kinase inhibitor SMR2-like	0.7083	0.863	0.9807	0.75	0.7647	0.5312
chr14	20762313	up5Kb	JreChr14G10705	-	-	-	1	1	1	1	1	0.9375
chr14	20762350	up5Kb	JreChr14G10705	-	-	-	1	1	0.9807	0.8125	0.8627	0.7812
chr14	20762365	up5Kb	JreChr14G10705	-	-	-	0.7187	0.863	0.9807	0.75	0.7549	0.5312
chr14	20762371	up5Kb	JreChr14G10705	-	-	-	1	1	1	1	1	0.9687
chr14	20762384	up5Kb	JreChr14G10705	-	-	-	0.7083	0.863	0.9807	0.75	0.7549	0.5312
chr14	20762715	up5Kb	JreChr14G10705	-	-	-	1	1	1	1	1	0.9375
chr14	20762767	up5Kb	JreChr14G10705	-	-	-	0.7187	0.863	0.9807	0.75	0.7549	0.5625
chr14	20762770	up5Kb	JreChr14G10705	-	-	-	0.7187	0.863	0.9807	0.75	0.7549	0.5625
chr14	20762782	up5Kb	JreChr14G10705	-	-	-	1	1	1	1	1	0.9687
chr14	20762793	up5Kb	JreChr14G10705	-	-	-	0.7083	0.863	0.9807	0.7375	0.7549	0.5625
chr14	20762869	up5Kb	JreChr14G10705	-	-	-	0.7291	0.863	0.9807	0.75	0.7549	0.5625
chr14	20762895	up5Kb	JreChr14G10705	-	-	-	0.9895	1	1	0.975	0.9901	0.9687
chr14	20762947	up5Kb	JreChr14G10705	-	-	-	0.7083	0.9041	0.9807	0.75	0.7647	0.6562
chr14	20763312	up5Kb	JreChr14G10705	-	-	-	0.7083	0.863	0.9807	0.75	0.7549	0.5312
chr14	20763321	up5Kb	JreChr14G10705	-	-	-	1	1	1	1	1	0.9687
chr14	20763322	up5Kb	JreChr14G10705	-	-	-	0.9895	1	0.9807	0.8125	0.8627	0.7812
chr14	20763340	up5Kb	JreChr14G10705	-	-	-	0.7083	0.863	0.9807	0.75	0.7549	0.5312
chr14	20763347	up5Kb	JreChr14G10705	-	-	-	0.7083	0.863	0.9807	0.75	0.7549	0.5312
chr14	20763398	up5Kb	JreChr14G10705	-	-	-	0.7083	0.863	0.9807	0.75	0.7549	0.5312
chr14	20763493	up5Kb	JreChr14G10705	-	-	-	1	1	1	1	1	0.9687
chr14	20766333	genic	JreChr14G10705	-	-	-	0.3541	0.1301	0.5	0.3875	0.6274	0.7812
chr14	20766359	genic	JreChr14G10705	-	-	-	1	0.9589	1	1	0.9019	0.8125
chr14	20766361	genic	JreChr14G10705	-	-	-	1	1	1	1	1	0.9687
chr14	20766362	genic	JreChr14G10705	-	-	-	0.7083	0.8698	0.9807	0.75	0.7549	0.5312
chr14	20766382	genic	JreChr14G10705	-	-	-	0.7083	0.8698	0.9807	0.75	0.7549	0.5312
chr14	20766465	CDS	JreChr14G10705	-	-	-	0.9895	1	1	1	1	0.9375
chr14	20766470	CDS	JreChr14G10705	-	-	-	0.9895	1	0.9807	0.8125	0.8627	0.7812
chr14	20766476	CDS	JreChr14G10705	-	-	-	0.7083	0.863	0.9807	0.75	0.7549	0.5312
chr14	20766514	down5Kb	JreChr14G10705	-	-	-	0.7083	0.863	0.9807	0.75	0.7549	0.5312
chr14	20766515	down5Kb	JreChr14G10705	-	-	-	1	1	1	1	0.9019	0.875
chr14	20766545	down5Kb	JreChr14G10705	-	-	-	1	0.9589	1	1	1	0.9375
chr14	20766548	down5Kb	JreChr14G10705	-	-	-	1	1	1	1	1	0.9687
chr14	20766669	down5Kb	JreChr14G10705	-	-	-	1	1	1	1	1	0.9375
chr14	20766670	down5Kb	JreChr14G10705	-	-	-	0.7083	0.863	0.9807	0.7625	0.7549	0.5312
chr14	20766686	down5Kb	JreChr14G10705	-	-	-	0.6979	0.863	0.9807	0.7625	0.7647	0.5312
chr14	20766707	down5Kb	JreChr14G10705	-	-	-	0.9895	1	1	1	1	0.9375
chr14	20766712	down5Kb	JreChr14G10705	-	-	-	0.7083	0.863	0.9807	0.75	0.7647	0.5312
chr14	20767202	down5Kb	JreChr14G10705	-	-	-	0.7083	0.863	0.9807	0.75	0.7549	0.5625
chr14	20767207	down5Kb	JreChr14G10705	-	-	-	0.7083	0.863	0.9807	0.75	0.7549	0.5312
chr14	20767354	down5Kb	JreChr14G10705	-	-	-	0.7083	0.863	0.9807	0.75	0.7549	0.5312
chr14	20767427	down5Kb	JreChr14G10705	-	-	-	0.7083	0.863	0.9615	0.75	0.745	0.5625
chr14	20767460	down5Kb	JreChr14G10705	-	-	-	0.7083	0.863	0.9807	0.75	0.745	0.5312
chr14	20767486	down5Kb	JreChr14G10705	-	-	-	1	1	1	1	1	0.9687
chr14	20767498	down5Kb	JreChr14G10705	-	-	-	1	0.9589	1	1	1	0.9375
chr14	20767501	down5Kb	JreChr14G10705	-	-	-	0.7083	0.863	0.9807	0.75	0.7549	0.5625
chr14	20767674	down5Kb	JreChr14G10705	-	-	-	1	1	1	1	1	0.9687
chr14	20767685	down5Kb	JreChr14G10705	-	-	-	0.7187	0.863	0.9807	0.75	0.7549	0.5312
chr15	12071956	down5Kb	JreChr15G10126	E3 ubiquitin-protein ligase ORTHRUS	zf-C3HC4,zf-C3HC4_3	E3 ubiquitin-protein ligase RMA, EC:2.3.2.27, Protein RING membrane-anchor, RING-type E3 ubiquitin transferase RMA	0.677	1	0.9807	0.7625	0.9509	0.6562
chr15	12071963	down5Kb	JreChr15G10126	E3 ubiquitin-protein ligase ORTHRUS	zf-C3HC4,zf-C3HC4_3	E3 ubiquitin-protein ligase RMA, EC:2.3.2.27, Protein RING membrane-anchor, RING-type E3 ubiquitin transferase RMA	0.677	1	0.9807	0.7625	0.8431	0.4375
chr15	12072015	down5Kb	JreChr15G10126	E3 ubiquitin-protein ligase ORTHRUS	zf-C3HC4,zf-C3HC4_3	E3 ubiquitin-protein ligase RMA, EC:2.3.2.27, Protein RING membrane-anchor, RING-type E3 ubiquitin transferase RMA	1	1	1	1	1	0.9375
chr15	12072060	down5Kb	JreChr15G10126	E3 ubiquitin-protein ligase ORTHRUS	zf-C3HC4,zf-C3HC4_3	E3 ubiquitin-protein ligase RMA, EC:2.3.2.27, Protein RING membrane-anchor, RING-type E3 ubiquitin transferase RMA	1	1	1	1	0.8921	0.8437
chr15	12072071	down5Kb	JreChr15G10126	E3 ubiquitin-protein ligase ORTHRUS	zf-C3HC4,zf-C3HC4_3	E3 ubiquitin-protein ligase RMA, EC:2.3.2.27, Protein RING membrane-anchor, RING-type E3 ubiquitin transferase RMA	0.6458	1	0.8461	0.7375	0.4705	0.1875
chr15	12072087	down5Kb	JreChr15G10126	E3 ubiquitin-protein ligase ORTHRUS	zf-C3HC4,zf-C3HC4_3	E3 ubiquitin-protein ligase RMA, EC:2.3.2.27, Protein RING membrane-anchor, RING-type E3 ubiquitin transferase RMA	0.6562	1	0.8461	0.7375	0.4803	0.1875
chr15	12072147	down5Kb	JreChr15G10126	E3 ubiquitin-protein ligase ORTHRUS	zf-C3HC4,zf-C3HC4_3	E3 ubiquitin-protein ligase RMA, EC:2.3.2.27, Protein RING membrane-anchor, RING-type E3 ubiquitin transferase RMA	1	1	1	1	0.8921	0.8437
chr15	12072151	down5Kb	JreChr15G10126	E3 ubiquitin-protein ligase ORTHRUS	zf-C3HC4,zf-C3HC4_3	E3 ubiquitin-protein ligase RMA, EC:2.3.2.27, Protein RING membrane-anchor, RING-type E3 ubiquitin transferase RMA	0.6666	1	0.9807	0.7875	0.8333	0.4687
chr15	12072176	down5Kb	JreChr15G10126	E3 ubiquitin-protein ligase ORTHRUS	zf-C3HC4,zf-C3HC4_3	E3 ubiquitin-protein ligase RMA, EC:2.3.2.27, Protein RING membrane-anchor, RING-type E3 ubiquitin transferase RMA	1	1	1	1	0.9901	0.9375
chr15	12072191	down5Kb	JreChr15G10126	E3 ubiquitin-protein ligase ORTHRUS	zf-C3HC4,zf-C3HC4_3	E3 ubiquitin-protein ligase RMA, EC:2.3.2.27, Protein RING membrane-anchor, RING-type E3 ubiquitin transferase RMA	0.677	1	0.9807	0.7875	0.9411	0.6562
chr15	31528518	down5Kb	JreChr15G11290	-	Bap31	Endoplasmic reticulum transmembrane protein	1	1	1	0.8875	0.9901	0.8125
chr16	5367230	down5Kb	JreChr16G10981	J domain-containing protein required for chloroplast accumulation response	-	J domain-containing protein required for chloroplast accumulation response 1-like	1	1	1	0.875	0.9901	0.8125
chr16	5367251	down5Kb	JreChr16G10981	J domain-containing protein required for chloroplast accumulation response	-	J domain-containing protein required for chloroplast accumulation response 1-like	0.9375	1	0.9807	0.925	0.8529	0.75
chr16	5367276	down5Kb	JreChr16G10981	J domain-containing protein required for chloroplast accumulation response	-	J domain-containing protein required for chloroplast accumulation response 1-like	0.9375	1	0.9807	0.925	0.8529	0.75
chr16	5367277	down5Kb	JreChr16G10981	J domain-containing protein required for chloroplast accumulation response	-	J domain-containing protein required for chloroplast accumulation response 1-like	0.9375	1	0.9807	0.925	0.8529	0.75
chr16	5367285	down5Kb	JreChr16G10981	J domain-containing protein required for chloroplast accumulation response	-	J domain-containing protein required for chloroplast accumulation response 1-like	0.9375	1	0.9807	0.925	0.8529	0.75
chr16	5367394	down5Kb	JreChr16G10981	J domain-containing protein required for chloroplast accumulation response	-	J domain-containing protein required for chloroplast accumulation response 1-like	0.9375	1	0.9807	0.9125	0.8529	0.7187
chr16	5956263	up5Kb	JreChr16G11035	-	-	-	0.9791	1	1	0.9875	1	0.9062
chr16	5956269	up5Kb	JreChr16G11035	-	-	-	0.5104	0.363	1	0.5125	0.8529	0.3125
chr16	5956290	up5Kb	JreChr16G11035	-	-	-	0.9791	1	1	0.9875	1	0.9062
chr16	5956295	up5Kb	JreChr16G11035	-	-	-	0.9791	1	1	0.9875	1	0.9375
chr16	5956305	up5Kb	JreChr16G11035	-	-	-	0.9791	1	1	0.9875	1	0.9375
chr16	5956306	up5Kb	JreChr16G11035	-	-	-	0.9791	1	1	0.9875	1	0.9375
chr16	5956312	up5Kb	JreChr16G11035	-	-	-	0.9791	1	1	0.9875	1	0.9375
chr16	5956316	up5Kb	JreChr16G11035	-	-	-	0.9791	1	1	0.9875	1	0.9375
chr16	5956329	up5Kb	JreChr16G11035	-	-	-	0.5104	0.363	1	0.5	0.8627	0.2812
chr16	5956342	up5Kb	JreChr16G11035	-	-	-	0.9791	1	1	1	1	0.9687
chr16	5956343	up5Kb	JreChr16G11035	-	-	-	0.9791	1	1	1	1	0.9687
chr16	5956348	up5Kb	JreChr16G11035	-	-	-	0.9791	1	1	1	1	0.9375
chr16	5956349	up5Kb	JreChr16G11035	-	-	-	0.9791	1	1	1	1	0.9375
chr16	5956370	up5Kb	JreChr16G11035	-	-	-	1	1	1	1	0.9901	0.7812
chr16	5956371	up5Kb	JreChr16G11035	-	-	-	0.5208	0.363	1	0.5	0.8627	0.2812
chr16	5956376	up5Kb	JreChr16G11035	-	-	-	0.9791	1	1	0.9875	1	0.9375
chr16	5956402	up5Kb	JreChr16G11035	-	-	-	1	1	1	1	1	0.9687
chr16	5956437	up5Kb	JreChr16G11035	-	-	-	0.5208	0.363	1	0.5125	0.8627	0.2812
chr16	5956438	up5Kb	JreChr16G11035	-	-	-	0.5208	0.363	1	0.5125	0.8627	0.2812
chr16	5956448	up5Kb	JreChr16G11035	-	-	-	0.5104	0.363	1	0.5125	0.8627	0.3125
chr16	5956455	up5Kb	JreChr16G11035	-	-	-	1	1	1	1	0.9901	0.75
chr16	5956457	up5Kb	JreChr16G11035	-	-	-	0.5104	0.363	1	0.5	0.8627	0.2812
chr16	5956459	up5Kb	JreChr16G11035	-	-	-	0.5104	0.363	1	0.5	0.8627	0.2812
chr16	5956530	up5Kb	JreChr16G11035	-	-	-	0.5312	0.3698	1	0.5375	0.8627	0.3125
chr16	5956531	up5Kb	JreChr16G11035	-	-	-	0.5312	0.3698	1	0.5375	0.8627	0.3125
chr2	19875910	up5Kb	JreChr02G10726	U4 U6.U5 tri-snRNP-associated protein	SART-1	SART-1 family protein DOT2	1	1	1	1	0.9215	0.75
chr2	19876543	up5Kb	JreChr02G10726	U4 U6.U5 tri-snRNP-associated protein	SART-1	SART-1 family protein DOT2	1	1	1	1	0.9313	0.6875
chr2	19876597	up5Kb	JreChr02G10726	U4 U6.U5 tri-snRNP-associated protein	SART-1	SART-1 family protein DOT2	1	1	1	1	1	0.9062
chr3	4087543	genic	JreChr03G12430	PGAP1-like protein	PGAP1	GPI inositol-deacylase, EC:3.1.-.-	1	1	1	1	1	0.8437
chr3	4087545	genic	JreChr03G12430	PGAP1-like protein	PGAP1	GPI inositol-deacylase, EC:3.1.-.-	1	1	1	1	0.9705	0.875
chr3	14756211	down5Kb	JreChr03G10445	Belongs to the protein kinase superfamily	Pkinase,Pkinase_Tyr	non-specific serine/threonine protein kinase, EC:2.7.11.1	0.9687	1	1	0.875	0.9607	0.6875
chr3	14756223	down5Kb	JreChr03G10445	Belongs to the protein kinase superfamily	Pkinase,Pkinase_Tyr	non-specific serine/threonine protein kinase, EC:2.7.11.1	1	0.9863	1	1	0.9803	0.9062
chr3	14756228	down5Kb	JreChr03G10445	Belongs to the protein kinase superfamily	Pkinase,Pkinase_Tyr	non-specific serine/threonine protein kinase, EC:2.7.11.1	1	0.9863	1	1	0.9803	0.9062
chr3	14756289	down5Kb	JreChr03G10445	Belongs to the protein kinase superfamily	Pkinase,Pkinase_Tyr	non-specific serine/threonine protein kinase, EC:2.7.11.1	1	1	1	1	1	0.9687
chr3	14757273	down5Kb	JreChr03G10445	Belongs to the protein kinase superfamily	Pkinase,Pkinase_Tyr	non-specific serine/threonine protein kinase, EC:2.7.11.1	0.3854	0.8835	0.923	0.85	0.6372	0.3125
chr3	14757316	down5Kb	JreChr03G10445	Belongs to the protein kinase superfamily	Pkinase,Pkinase_Tyr	non-specific serine/threonine protein kinase, EC:2.7.11.1	1	1	1	1	1	0.9062
chr3	15803732	up5Kb	JreChr03G10549	Belongs to the AAA ATPase family	AAA	26S proteasome regulatory subunit 4 homolog B-like	0.4062	0.2739	0.1153	0.45	0.1666	0.5312
chr3	17933730	down5Kb	JreChr03G10744	-	-	-	1	1	1	1	0.9901	0.875
chr3	17933843	down5Kb	JreChr03G10744	-	-	-	1	1	1	1	0.8529	0.6875
chr3	20156395	CDS	JreChr03G10963	-	-	-	0.9791	1	1	0.95	1	0.7187
chr3	20156429	CDS	JreChr03G10963	-	-	-	0.9791	1	1	0.9625	0.9901	0.5937
chr3	20156430	CDS	JreChr03G10963	-	-	-	0.9791	1	1	0.9625	0.9901	0.5937
chr3	20156679	up5Kb	JreChr03G10962	-	-	-	1	1	1	0.9625	1	0.6562
chr3	31788779	down5Kb	JreChr03G11645	-	-	-	0.7604	1	1	1	0.8333	0.75
chr4	2464781	up5Kb	JreChr04G10928	Bromodomain extra-terminal - transcription regulation	BET	NET domain-containing protein	0.9479	0.952	0.923	1	0.9901	0.7812
chr4	5584060	down5Kb	JreChr04G12150	Domain of unknown function (DUF4336)	DUF4336	T4P13.26 protein	0.9895	1	1	0.975	0.9019	0.8125
chr4	5584067	down5Kb	JreChr04G12150	Domain of unknown function (DUF4336)	DUF4336	T4P13.26 protein	0.9895	1	1	0.975	0.9019	0.8125
chr4	10494831	down5Kb	JreChr04G10043	Pentatricopeptide repeat-containing protein At4g39952	PPR,PPR_2	Pentatricopeptide repeat-containing protein At4g39952, mitochondrial-like	1	0.9726	1	0.9625	0.9901	0.9062
chr4	12303270	genic	JreChr04G10213	chitin elicitor receptor kinase	LysM,Pkinase,Pkinase_Tyr	non-specific serine/threonine protein kinase, EC:2.7.11.1	1	0.9931	1	1	1	0.9687
chr4	12303297	genic	JreChr04G10213	chitin elicitor receptor kinase	LysM,Pkinase,Pkinase_Tyr	non-specific serine/threonine protein kinase, EC:2.7.11.1	0.927	1	1	1	0.9313	0.7187
chr5	12779170	down5Kb	JreChr05G10292	-	-	-	0.9479	1	1	0.8	0.8823	0.75
chr5	12779230	down5Kb	JreChr05G10292	-	-	-	1	1	1	1	1	0.9375
chr5	12779246	down5Kb	JreChr05G10292	-	-	-	0.9895	1	1	1	0.9901	0.7187
chr5	12779336	down5Kb	JreChr05G10292	-	-	-	0.1041	0.0342	0.2307	0.375	0.245	0.7187
chr5	12779352	down5Kb	JreChr05G10292	-	-	-	0.9479	1	1	0.8	0.8823	0.75
chr5	12779396	down5Kb	JreChr05G10292	-	-	-	0.1041	0.0342	0.2307	0.3875	0.245	0.7187
chr5	12779479	down5Kb	JreChr05G10292	-	-	-	0.9895	1	1	1	0.9901	0.7812
chr5	12779674	down5Kb	JreChr05G10292	-	-	-	0.9479	1	1	0.825	0.9117	0.75
chr5	32194795	up5Kb	JreChr05G11618	-	-	-	0.9687	1	1	0.925	1	0.875
chr6	2576869	genic	JreChr06G11221	ABC transporter G family member	ABC2_membrane,ABC_tran	ABC transporter G family member 7	0.9687	1	0.9038	1	0.9215	0.75
chr6	2576923	genic	JreChr06G11221	ABC transporter G family member	ABC2_membrane,ABC_tran	ABC transporter G family member 7	0.9583	1	0.9807	1	0.9411	0.8437
chr6	2577272	genic	JreChr06G11221	ABC transporter G family member	ABC2_membrane,ABC_tran	ABC transporter G family member 7	0.5104	0.2328	0.423	0.6375	0.4607	0.7812
chr6	2577301	genic	JreChr06G11221	ABC transporter G family member	ABC2_membrane,ABC_tran	ABC transporter G family member 7	0.9166	0.9794	0.9807	0.9625	0.8921	0.7812
chr6	2577394	genic	JreChr06G11221	ABC transporter G family member	ABC2_membrane,ABC_tran	ABC transporter G family member 7	0.9687	1	0.9038	1	0.9215	0.75
chr6	2577449	genic	JreChr06G11221	ABC transporter G family member	ABC2_membrane,ABC_tran	ABC transporter G family member 7	0.9166	0.9794	0.9807	0.9625	0.8921	0.75
chr6	2577532	genic	JreChr06G11221	ABC transporter G family member	ABC2_membrane,ABC_tran	ABC transporter G family member 7	0.9687	1	0.9038	1	0.9215	0.75
chr6	2577534	genic	JreChr06G11221	ABC transporter G family member	ABC2_membrane,ABC_tran	ABC transporter G family member 7	0.927	0.9794	0.9807	0.9625	0.8921	0.75
chr6	2577544	genic	JreChr06G11221	ABC transporter G family member	ABC2_membrane,ABC_tran	ABC transporter G family member 7	0.9166	0.9794	0.9807	0.95	0.8921	0.75
chr6	2577555	genic	JreChr06G11221	ABC transporter G family member	ABC2_membrane,ABC_tran	ABC transporter G family member 7	0.9687	1	0.9038	1	0.9215	0.75
chr6	2577566	genic	JreChr06G11221	ABC transporter G family member	ABC2_membrane,ABC_tran	ABC transporter G family member 7	0.5104	0.7671	0.8846	0.7875	0.7941	0.2812
chr6	2577589	genic	JreChr06G11221	ABC transporter G family member	ABC2_membrane,ABC_tran	ABC transporter G family member 7	0.9583	1	1	0.9625	0.9509	0.875
chr6	2577705	genic	JreChr06G11221	ABC transporter G family member	ABC2_membrane,ABC_tran	ABC transporter G family member 7	0.9166	0.9794	0.9807	0.9625	0.8921	0.7812
chr6	2577785	genic	JreChr06G11221	ABC transporter G family member	ABC2_membrane,ABC_tran	ABC transporter G family member 7	1	1	1	1	1	0.9375
chr6	2577791	genic	JreChr06G11221	ABC transporter G family member	ABC2_membrane,ABC_tran	ABC transporter G family member 7	0.9583	1	1	0.9625	0.9509	0.875
chr6	2577800	genic	JreChr06G11221	ABC transporter G family member	ABC2_membrane,ABC_tran	ABC transporter G family member 7	1	1	1	0.9875	1	0.9375
chr6	2577971	genic	JreChr06G11221	ABC transporter G family member	ABC2_membrane,ABC_tran	ABC transporter G family member 7	0.9583	0.8287	0.9038	1	0.9411	0.8125
chr6	2578014	genic	JreChr06G11221	ABC transporter G family member	ABC2_membrane,ABC_tran	ABC transporter G family member 7	0.9166	0.9794	0.9807	0.9625	0.8921	0.7812
chr6	2578077	genic	JreChr06G11221	ABC transporter G family member	ABC2_membrane,ABC_tran	ABC transporter G family member 7	0.9166	1	0.9807	0.9625	0.8921	0.7812
chr6	2578267	genic	JreChr06G11221	ABC transporter G family member	ABC2_membrane,ABC_tran	ABC transporter G family member 7	0.9166	0.9794	0.9807	0.9625	0.8921	0.7812
chr6	2579126	genic	JreChr06G11221	ABC transporter G family member	ABC2_membrane,ABC_tran	ABC transporter G family member 7	0.9166	0.9794	0.9807	0.9625	0.8921	0.7812
chr6	2579141	genic	JreChr06G11221	ABC transporter G family member	ABC2_membrane,ABC_tran	ABC transporter G family member 7	1	1	1	1	0.9901	0.9687
chr6	2579153	genic	JreChr06G11221	ABC transporter G family member	ABC2_membrane,ABC_tran	ABC transporter G family member 7	1	1	1	0.9875	1	0.9687
chr6	2579648	genic	JreChr06G11221	ABC transporter G family member	ABC2_membrane,ABC_tran	ABC transporter G family member 7	0.5208	0.7671	0.8846	0.9375	0.8137	0.3437
chr6	2582671	genic	JreChr06G11221	ABC transporter G family member	ABC2_membrane,ABC_tran	ABC transporter G family member 7	0.9583	0.8287	0.9038	1	0.9215	0.6562
chr6	2583344	CDS	JreChr06G11221	ABC transporter G family member	ABC2_membrane,ABC_tran	ABC transporter G family member 7	1	1	1	1	0.9803	0.8437
chr6	6893826	down5Kb	JreChr06G12074	Alpha/beta hydrolase family	Abhydrolase_1	Aminoacrylate hydrolase RutD isoform X2	0.8541	1	0.8653	0.8875	0.8627	0.4687
chr6	6894024	down5Kb	JreChr06G12074	Alpha/beta hydrolase family	Abhydrolase_1	Aminoacrylate hydrolase RutD isoform X2	0.9166	1	0.8653	0.9	0.8725	0.6562
chr6	6894048	down5Kb	JreChr06G12074	Alpha/beta hydrolase family	Abhydrolase_1	Aminoacrylate hydrolase RutD isoform X2	0.927	1	0.8653	0.8875	0.8725	0.6875
chr6	6894070	down5Kb	JreChr06G12074	Alpha/beta hydrolase family	Abhydrolase_1	Aminoacrylate hydrolase RutD isoform X2	0.8541	1	0.8653	0.8875	0.8627	0.5312
chr6	6895922	down5Kb	JreChr06G12074	Alpha/beta hydrolase family	Abhydrolase_1	Aminoacrylate hydrolase RutD isoform X2	1	1	1	1	1	0.9375
chr6	6895927	down5Kb	JreChr06G12074	Alpha/beta hydrolase family	Abhydrolase_1	Aminoacrylate hydrolase RutD isoform X2	0.7916	0.7123	0.6538	0.7	0.549	0.3125
chr6	6895932	down5Kb	JreChr06G12074	Alpha/beta hydrolase family	Abhydrolase_1	Aminoacrylate hydrolase RutD isoform X2	0.2083	0.2876	0.3461	0.5625	0.5	0.7812
chr6	6895939	down5Kb	JreChr06G12074	Alpha/beta hydrolase family	Abhydrolase_1	Aminoacrylate hydrolase RutD isoform X2	0.2083	0.2876	0.3461	0.5625	0.5	0.7812
chr6	6896002	down5Kb	JreChr06G12074	Alpha/beta hydrolase family	Abhydrolase_1	Aminoacrylate hydrolase RutD isoform X2	0.9062	0.9931	1	1	0.9705	0.6875
chr7	12692950	up5Kb	JreChr07G10185	-	-	-	0.625	0.5547	0.7115	0.9375	0.8627	0.5312
chr7	12692951	up5Kb	JreChr07G10185	-	-	-	0.8854	0.9931	1	1	0.8431	0.75
chr7	12692969	up5Kb	JreChr07G10185	-	-	-	0.625	0.5547	0.5192	0.6	0.6568	0.375
chr7	12693029	up5Kb	JreChr07G10185	-	-	-	0.625	0.5547	0.5	0.6	0.647	0.375
chr7	12693035	up5Kb	JreChr07G10185	-	-	-	1	1	1	1	1	0.9687
chr7	12693037	up5Kb	JreChr07G10185	-	-	-	0.625	0.5616	0.5	0.6	0.647	0.375
chr7	12693038	up5Kb	JreChr07G10185	-	-	-	0.625	0.5616	0.6923	0.9375	0.8627	0.5312
chr7	12693064	up5Kb	JreChr07G10185	-	-	-	1	1	1	1	1	0.9062
chr8	30010554	up5Kb	JreChr08G11495	gpi-anchored protein	-	Uncharacterized GPI-anchored protein At3g06035-like	0.9895	1	1	1	0.9705	0.875
chr8	30010558	up5Kb	JreChr08G11495	gpi-anchored protein	-	Uncharacterized GPI-anchored protein At3g06035-like	0.4583	0.7739	0.7884	0.55	0.5392	0.2812
chr9	3840425	up5Kb	JreChr09G11906	-	-	-	0.7708	0.9931	0.9615	0.925	0.8529	0.625
